# Supplementary material for: Low-spin to low-spin valence tautomeric transition in cobalt bis-dioxolenes
Source: Royal Society of Chemistry journal article supplement (doi:10.1039/d3dt03935h), 2024-01-01
Supplement: d3dt03935h1.pdf [file d3dt03935h1.pdf]

Supporting Information

# Low-Spin to Low-Spin Valence Tautomeric Transition in Cobalt Bis-Dioxolenes

*Max Mörtel,<sup>a</sup> Stephen J. Goodner,<sup>a</sup> Johannes Oswald,<sup>b</sup> Andreas Scheurer,<sup>a</sup> Thomas Drewello<sup>b</sup>*

*and*

*Marat M. Khusniyarov<sup>a\*</sup>*

<sup>a</sup> Department of Chemistry and Pharmacy

Friedrich-Alexander University Erlangen-Nürnberg (FAU)

Egerlandstraße 1, 91058 Erlangen, Germany

<sup>b</sup> Department of Chemistry and Pharmacy

Friedrich-Alexander University Erlangen-Nürnberg (FAU)

Egerlandstraße 3, 91058 Erlangen, Germany

\*corresponding author: [marat.khusniyarov@fau.de](mailto:marat.khusniyarov@fau.de)

## Table of Contents

|                                                               |           |
|---------------------------------------------------------------|-----------|
| <b>UV/Vis</b> .....                                           | <b>3</b>  |
| Titration with TBACN .....                                    | 3         |
| Comparison of different species .....                         | 6         |
| Variable-Temperature Electronic Absorption Spectroscopy ..... | 8         |
| <b>Magnetic Data</b> .....                                    | <b>11</b> |
| <b>Comparison of UV/Vis and magnetic data</b> .....           | <b>12</b> |
| <b>EPR Data</b> .....                                         | <b>13</b> |
| <b>IR Spectroscopy</b> .....                                  | <b>19</b> |
| <b>Mass Spectrometry</b> .....                                | <b>21</b> |
| Positive-Ion Mode .....                                       | 21        |
| Negative-Ion Mode .....                                       | 22        |
| Isotope patterns .....                                        | 24        |
| <b>Theoretical Calculations</b> .....                         | <b>29</b> |

## UV/Vis

### Titration with TBACN

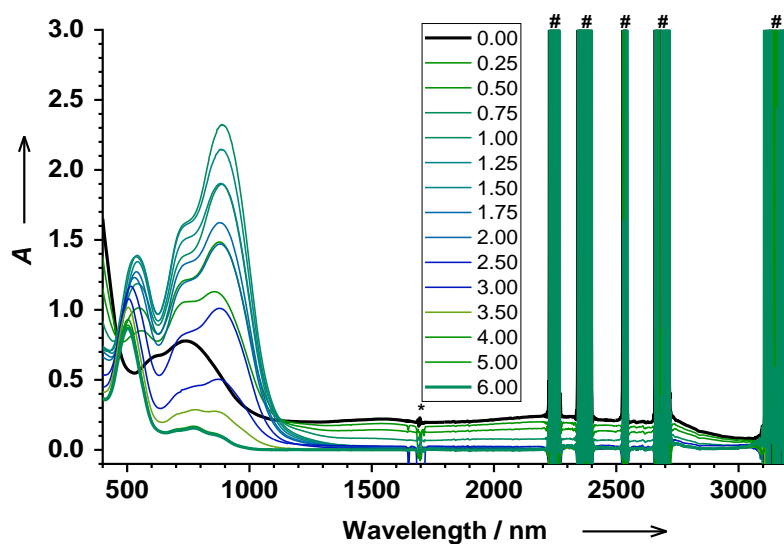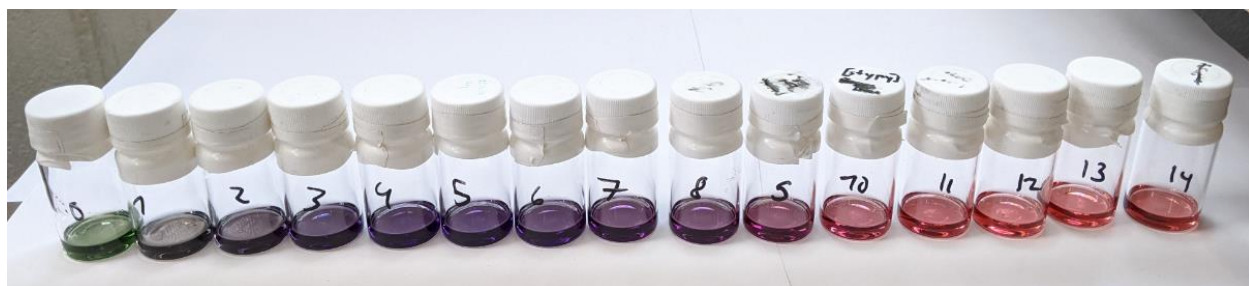

**Figure S1:** Top: Electronic absorption spectrum of [Co(<sup>t</sup>Bu-dioxolene)<sub>2</sub>(stypy)<sub>2</sub>] (1) in DCM ( $c = 5 \cdot 10^{-4}$  M) with different amounts of TBACN. (\*) is a spectrometer artefact, (#) are due to solvent overtones. Bottom: Color gradient of titration solutions used (0 to 6 equivalents of TBACN).

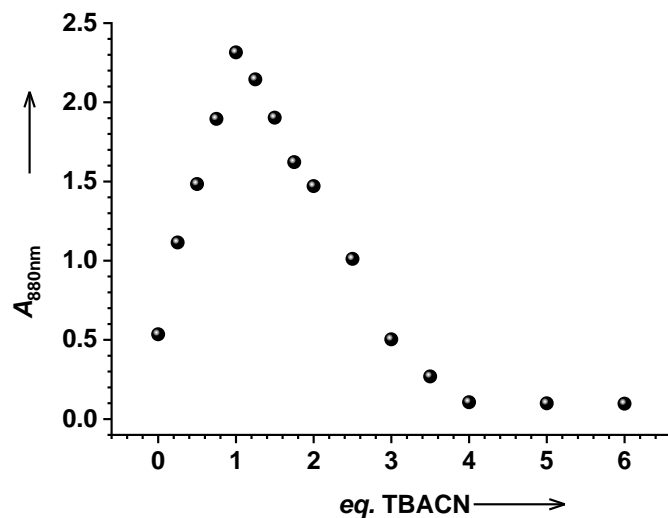

**Figure S2:** Evolution of the 880 nm absorption band of  $[\text{Co}(\text{4Bu-dioxolene})_2(\text{styppy})_2]$  (**1**) in DCM ( $c = 5 \cdot 10^{-4}$  M) with different equivalents of TBACN.

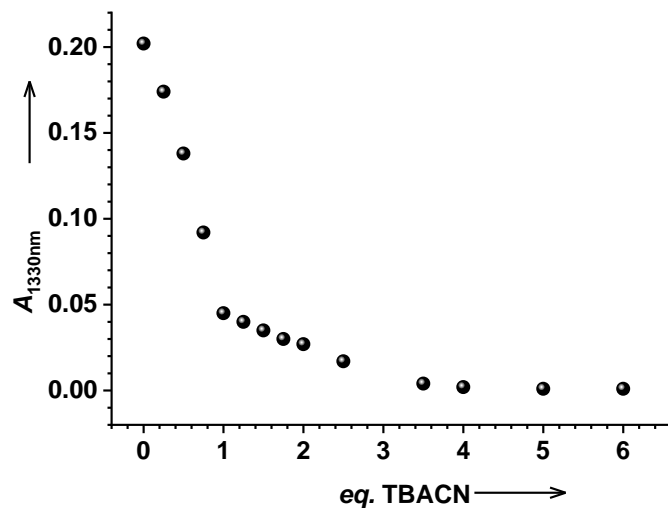

**Figure S3:** Evolution of the 1330 nm absorption band of  $[\text{Co}(\text{4Bu-dioxolene})_2(\text{styppy})_2]$  (**1**) in DCM ( $c = 5 \cdot 10^{-4}$  M) with different equivalents of TBACN.

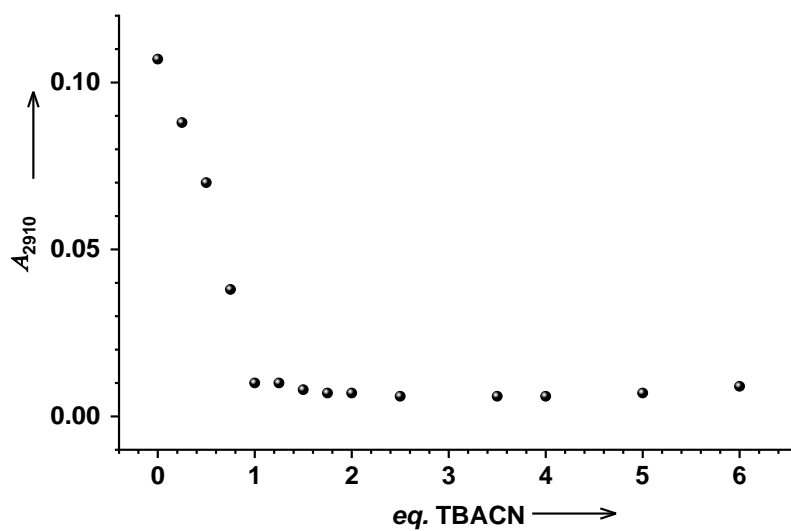

**Figure S4:** Evolution of the 2910 nm absorption band of  $[\text{Co}(t\text{Bu-dioxolene})_2(\text{stypy})_2]$  (**1**) in DCM ( $c = 5 \cdot 10^{-4}$  M) with different equivalents of TBACN.

## Comparison of different species

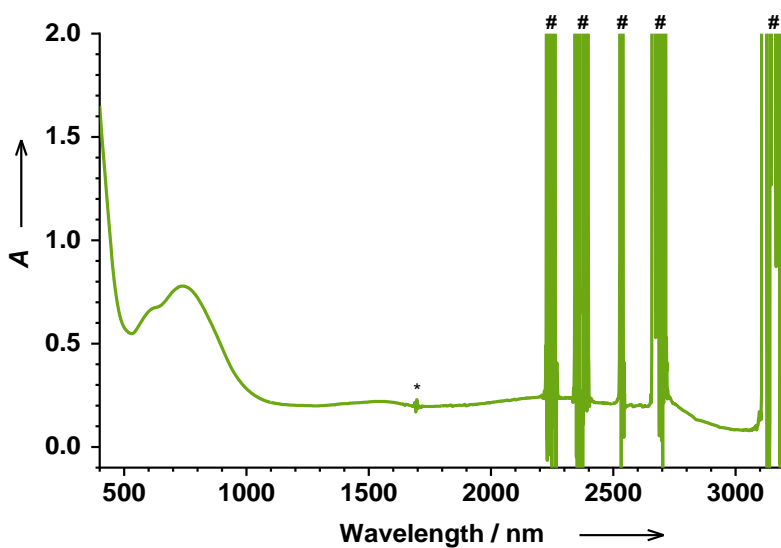

**Figure S5:** Electronic absorption spectrum of [Co(<sup>t</sup>Bu-dioxolene)<sub>2</sub>(styryl)<sub>2</sub>] (1) in DCM ( $c = 5 \cdot 10^{-4}$  M). (\*) is a spectrometer artefact, (#) are due to solvent overtones.

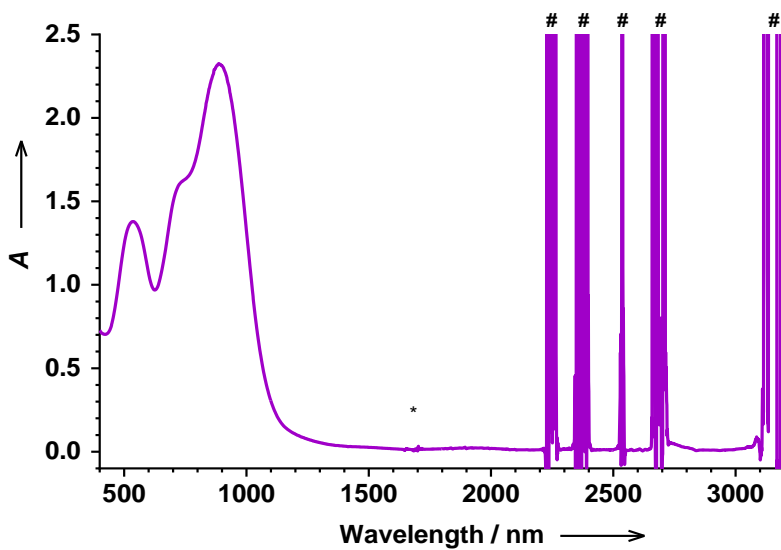

**Figure S6:** Electronic absorption spectrum of [Co(<sup>t</sup>Bu-dioxolene)<sub>2</sub>(styryl)<sub>2</sub>] (1) in DCM ( $c = 5 \cdot 10^{-4}$  M) with 1 equivalent of TBACN ("2"). (\*) is a spectrometer artefact, (#) are due to solvent overtones.

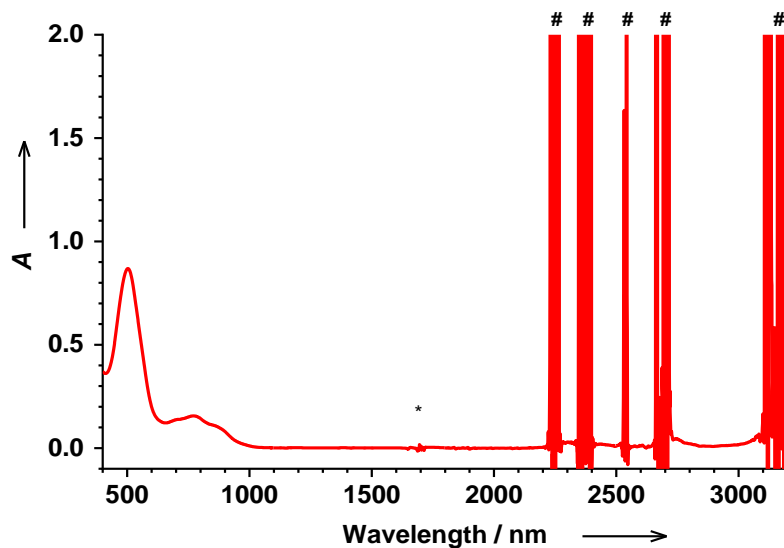

**Figure S7:** Electronic absorption spectrum of  $[\text{Co}(\text{tBu-dioxolene})_2(\text{stypy})_2]$  (**1**) in DCM ( $c = 5 \cdot 10^{-4}$  M) with 6 equivalents of TBACN. (\*) is a spectrometer artefact, (#) are due to solvent overtones.

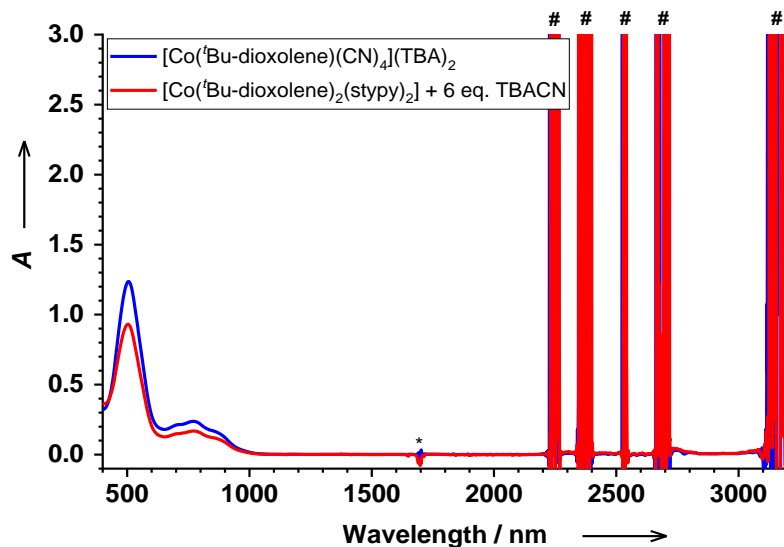

**Figure S8:** Comparison of electronic absorption spectra of  $[\text{Co}(\text{tBu-dioxolene})_2(\text{stypy})_2]$  (**1**) in DCM ( $c = 5 \cdot 10^{-4}$  M) with 6 eq. TBACN (red) and  $[\text{Co}(\text{tBu-dioxolene})(\text{CN})_4](\text{TBA})_2$  (**3**) (blue). (\*) is a spectrometer artefact, (#) are due to solvent overtones.

## Variable-Temperature Electronic Absorption Spectroscopy

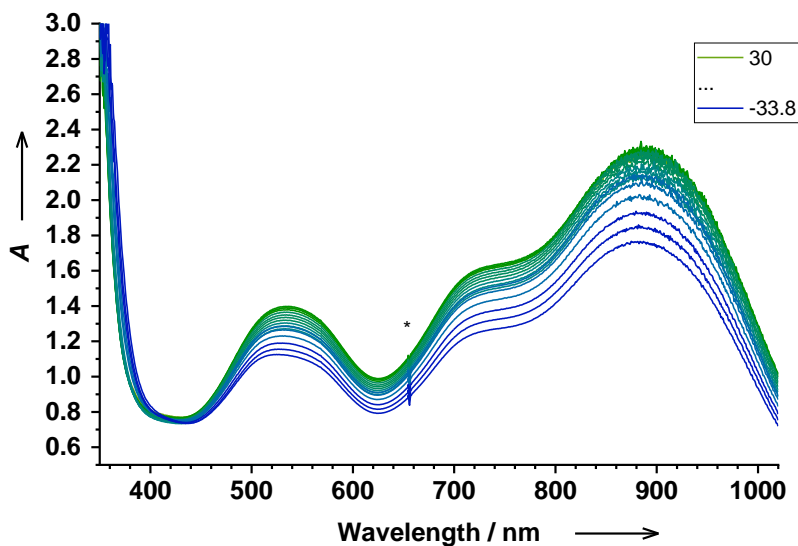

**Figure S9:** Temperature-dependent electronic absorption spectrum of *in situ* generated **2** in DCM ( $c = 5 \cdot 10^{-4}$  M). (\*) is a spectrometer artefact.

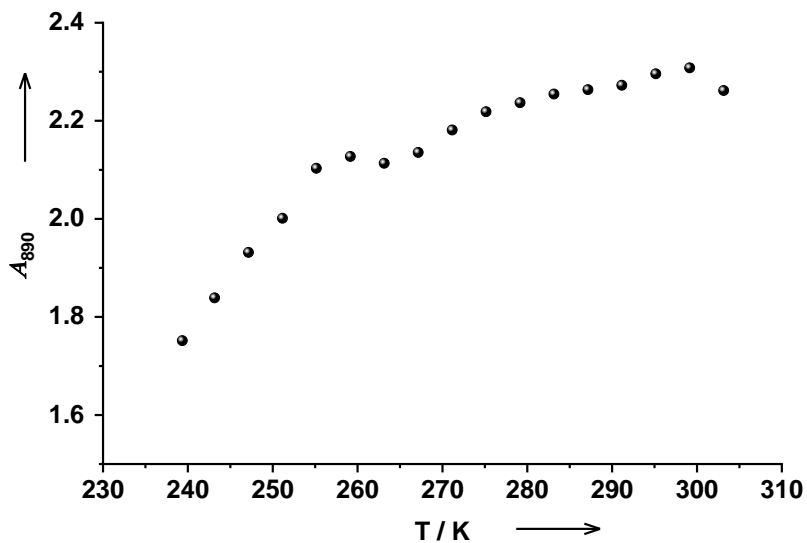

**Figure S10:** Temperature-dependent evolution of the 890nm absorption band of *in situ* generated **2** in DCM ( $c = 5 \cdot 10^{-4}$  M).



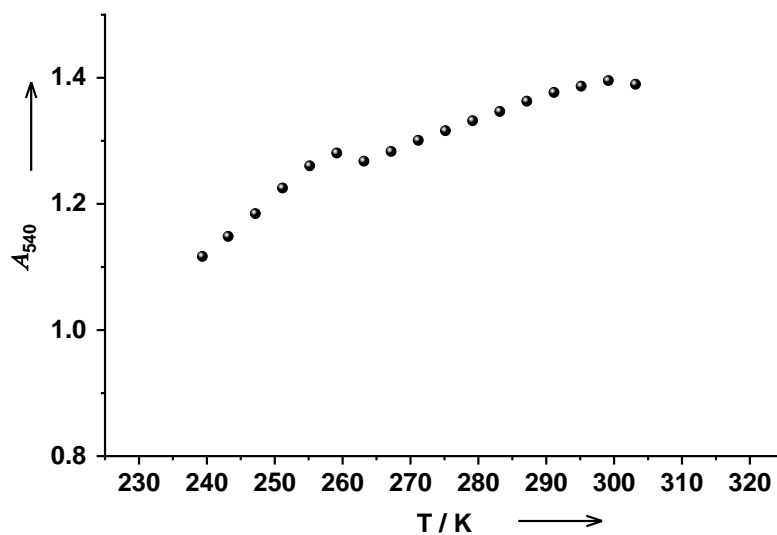

**Figure S11:** Temperature-dependent evolution of the 540nm absorption band of *in situ* generated **2** in DCM ( $c = 5 \cdot 10^{-4}$  M).

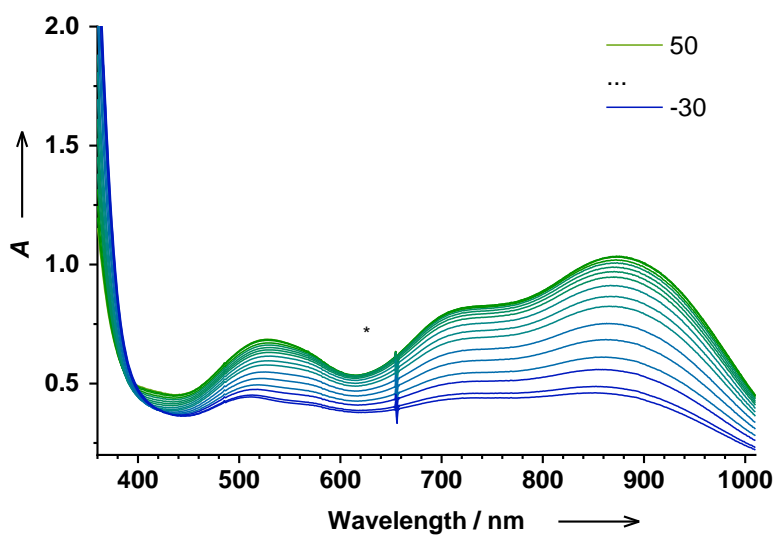

**Figure S12:** Temperature-dependent electronic absorption spectrum of *in situ* generated **2** in MeCN ( $c = 1 \cdot 10^{-4}$  M). (\*) is a spectrometer artefact.

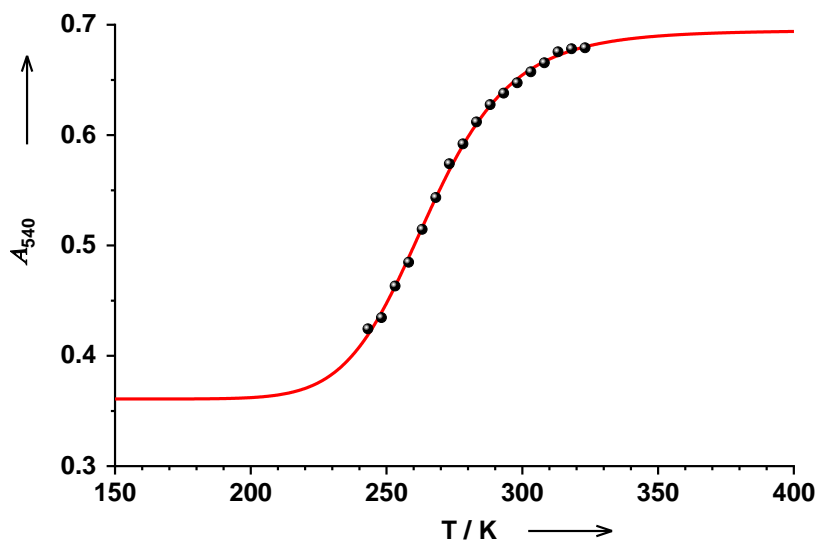

**Figure S13:** Temperature-dependent evolution of the 540nm absorption band of *in situ* generated **2** in MeCN ( $c = 1 \cdot 10^{-4}$  M). Fit parameters:  $A_{HT} = 0.69(1)$ ,  $A_{LT} = 0.36(1)$ ,  $\Delta H = 37(8)$  kJ mol $^{-1}$ ,  $\Delta S = 142(32)$  J K $^{-1}$ ,  $T_{1/2} = 265(1)$  K.

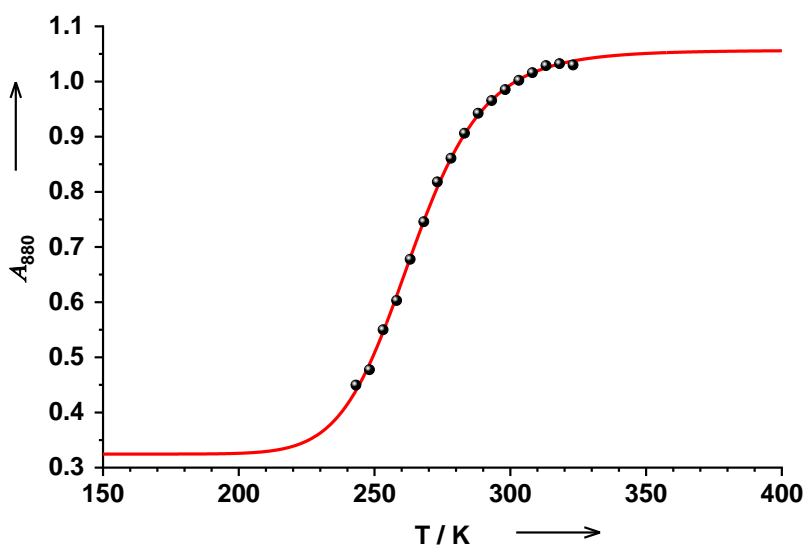

**Figure S14:** Temperature-dependent evolution of the 880nm absorption band of *in situ* generated **2** in MeCN ( $c = 1 \cdot 10^{-4}$  M). Fit parameters:  $A_{HT} = 1.05(1)$ ,  $A_{LT} = 0.32(1)$ ,  $\Delta H = 43(9)$  kJ mol $^{-1}$ ,  $\Delta S = 163(37)$  J K $^{-1}$ ,  $T_{1/2} = 263.9(5)$  K.

## Magnetic Data

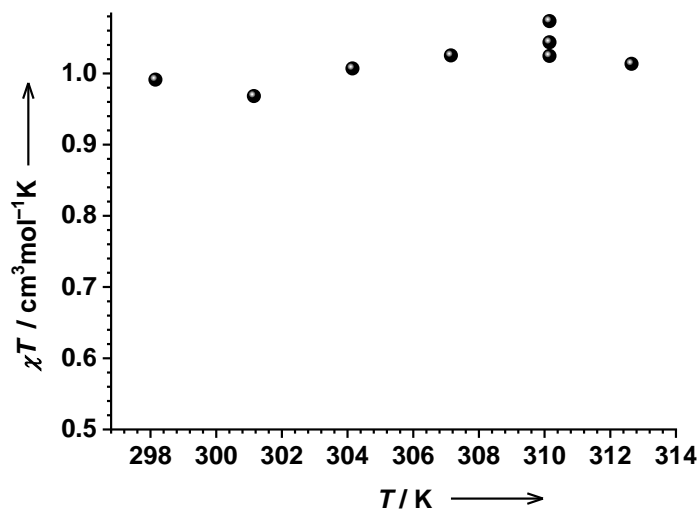

**Figure S15:** Temperature-dependent changes of the  $\chi T$  product of *in situ* generated **2** in DCM:DCM- $d_2$ -TMS (10:2:1) ( $c = 5 \cdot 10^{-4}$  M).

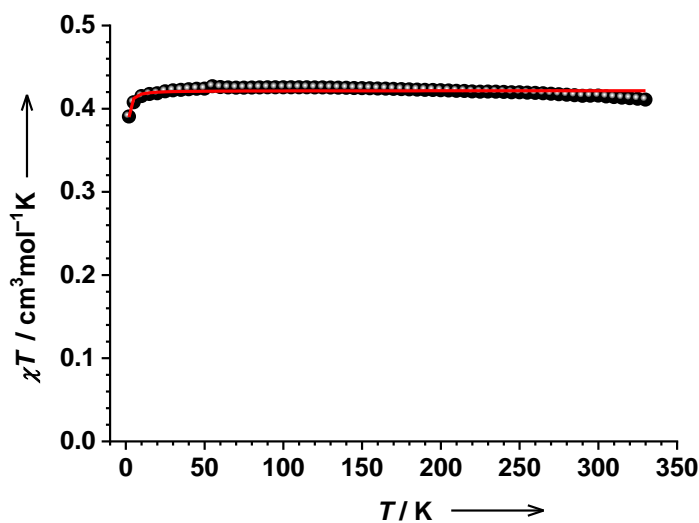

**Figure S16:** Variable-temperature  $\chi T$  product of  $[\text{Co}(\text{4Bu-dioxolene})(\text{CN})_4](\text{TBA})_2$  (**3**) measured on powder sample at an external magnetic field of 1T ( $1 \text{ K min}^{-1}$ , 5 K intervals), in the heating mode. Fit parameters for  $S = 1/2$  model:  $g = 2.120(1)$ , mean-field intermolecular interaction:  $zJ = -0.49(1) \text{ cm}^{-1}$ .

## Comparison of UV/Vis and magnetic data

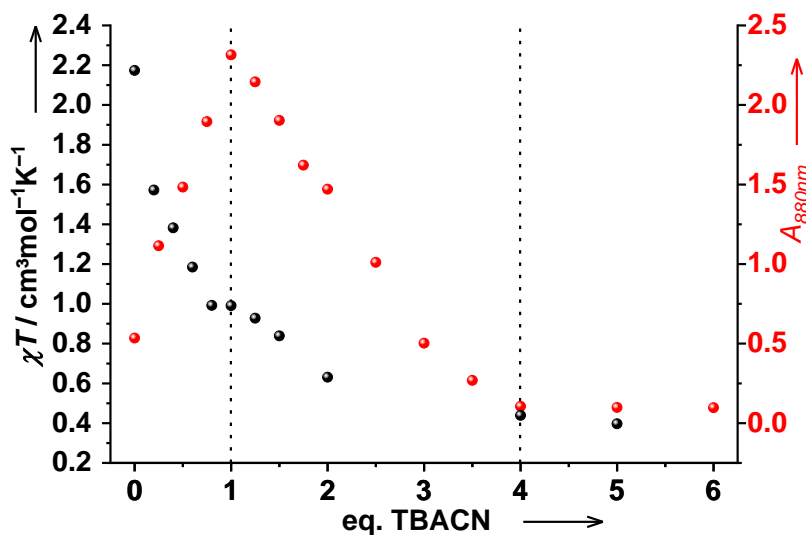

**Figure S17:** Changes of the  $\chi T$  product of  $[\text{Co}(\text{tBu-dioxolene})_2(\text{stypy})_2]$  (**1**) in DCM:DCM- $d_2$ -TMS (10:2:1) ( $c = 5 \cdot 10^{-4}$  M) with different amounts of TBACN (black). Evolution of the 880 nm absorption band of  $[\text{Co}(\text{tBu-dioxolene})_2(\text{stypy})_2]$  (**1**) in DCM ( $c = 5 \cdot 10^{-4}$  M) with different equivalents of TBACN (red).

**Table S1:** Comparison of thermodynamic parameters ( $\Delta H$ ,  $\Delta S$ ,  $T_{1/2}$ ) for  $[\text{Co}(\text{tBu-dioxolene})_2(\text{stypy})]$  (**1**) with one equivalent of TBACN obtained from NMR and UV/Vis experiments. Note that we were not able to fit and analyze variable-temperature UV-vis data recorded in DCM with confidence, because of high uncertainties in fit parameters. Slight discrepancies in fitted thermodynamic parameters (which are however with the error margins) are likely due to differing solvents and concentrations. Wherever possible all VT experiments have been carried out with DCM solutions ( $c = 5 \cdot 10^{-4}$  M). Only in case of VT UV/Vis experiments, we additionally performed measurements in MeCN, albeit at a low concentration ( $c = 1 \cdot 10^{-4}$  M) due to poorer solubility.

|                                      | VT-Evans NMR<br>DCM | VT UV/Vis<br>MeCN@880nm | VT UV/Vis<br>MeCN@540nm |
|--------------------------------------|---------------------|-------------------------|-------------------------|
| $\Delta H$<br>[kJmol <sup>-1</sup> ] | 51(10)              | 43(9)                   | 37(8)                   |
| $\Delta S$<br>[JK <sup>-1</sup> ]    | 207(41)             | 163(37)                 | 142(32)                 |
| $T_{1/2}$<br>[K]                     | 249(1)              | 264(1)                  | 265(1)                  |

## EPR Data

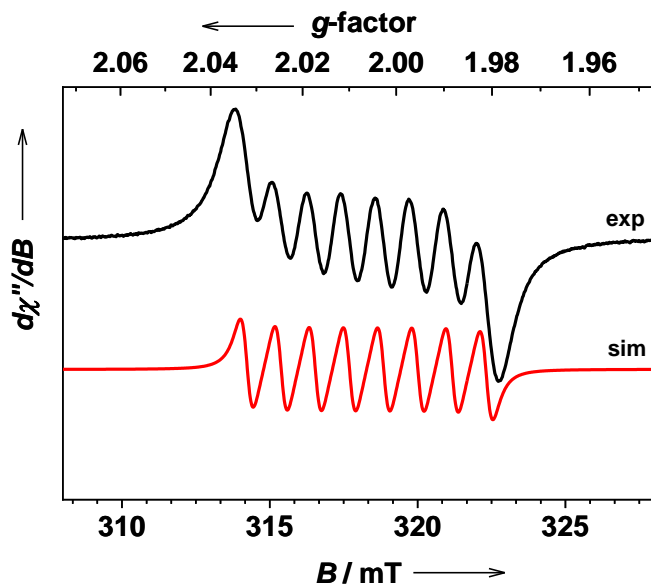

**Figure S18:** X-band EPR spectra **1** in DCM solution ( $c = 1$  mM) recorded in a capillary at RT. Frequency: 8.938 GHz, mod width: 0.1 mT, power: 1.0 mW. Simulation in red. Parameters:  $g_{\text{iso}} = 2.007$ ,  $A_{\text{iso}}(^{59}\text{Co}, I = 7/2) = 10.8 \cdot 10^{-4} \text{ cm}^{-1}$ ,  $W_{\text{iso}} = 0.5 \cdot 10^{-4} \text{ cm}^{-1} / \text{GHz}$ .

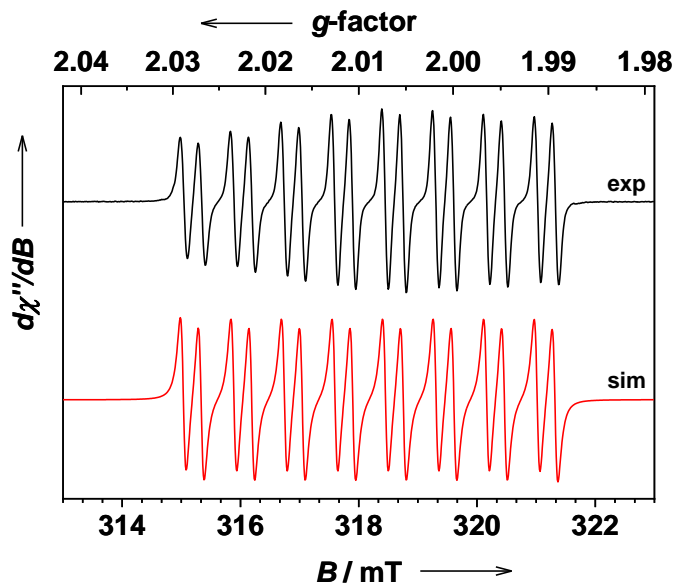

**Figure S19:** X-band EPR spectrum of **3** in DCM solution ( $c = 1$  mM) recorded in a capillary at RT. Frequency: 8.945 GHz, mod width: 0.1 mT, power: 1.0 mW. Fit in red. Parameters:  $g_{\text{iso}} = 2.009$ ,  $A(^{59}\text{Co}, I = 7/2) = 8.0 \cdot 10^{-4} \text{ cm}^{-1}$ ,  $A(^1\text{H}, I = 1/2) = 2.8 \cdot 10^{-4} \text{ cm}^{-1}$ .  $W_{\text{iso}} = 0.1 \cdot 10^{-4} \text{ cm}^{-1} / \text{GHz}$ .

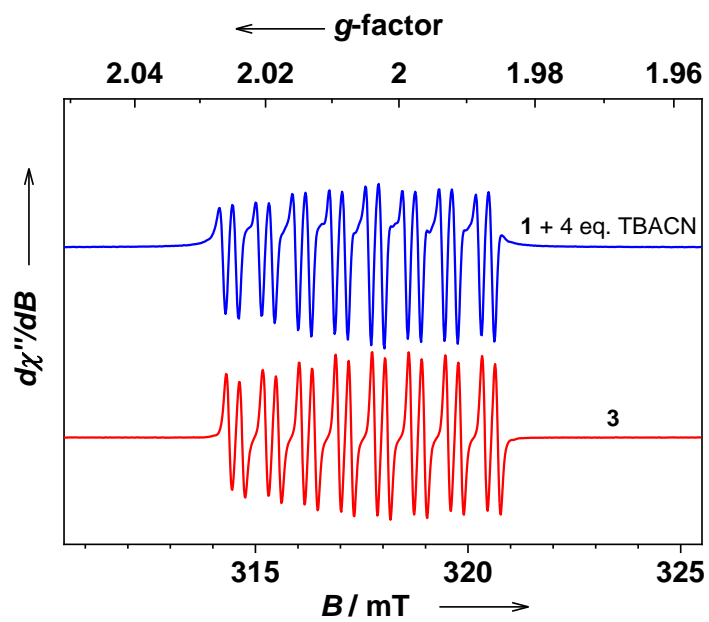

**Figure S20:** Comparison of X-band EPR spectra of the reference complex **3** (in red) and the *in-situ* formed **3** by reacting **1** with 4 eq. TBACN (in blue), both measured in DCM solution at RT.

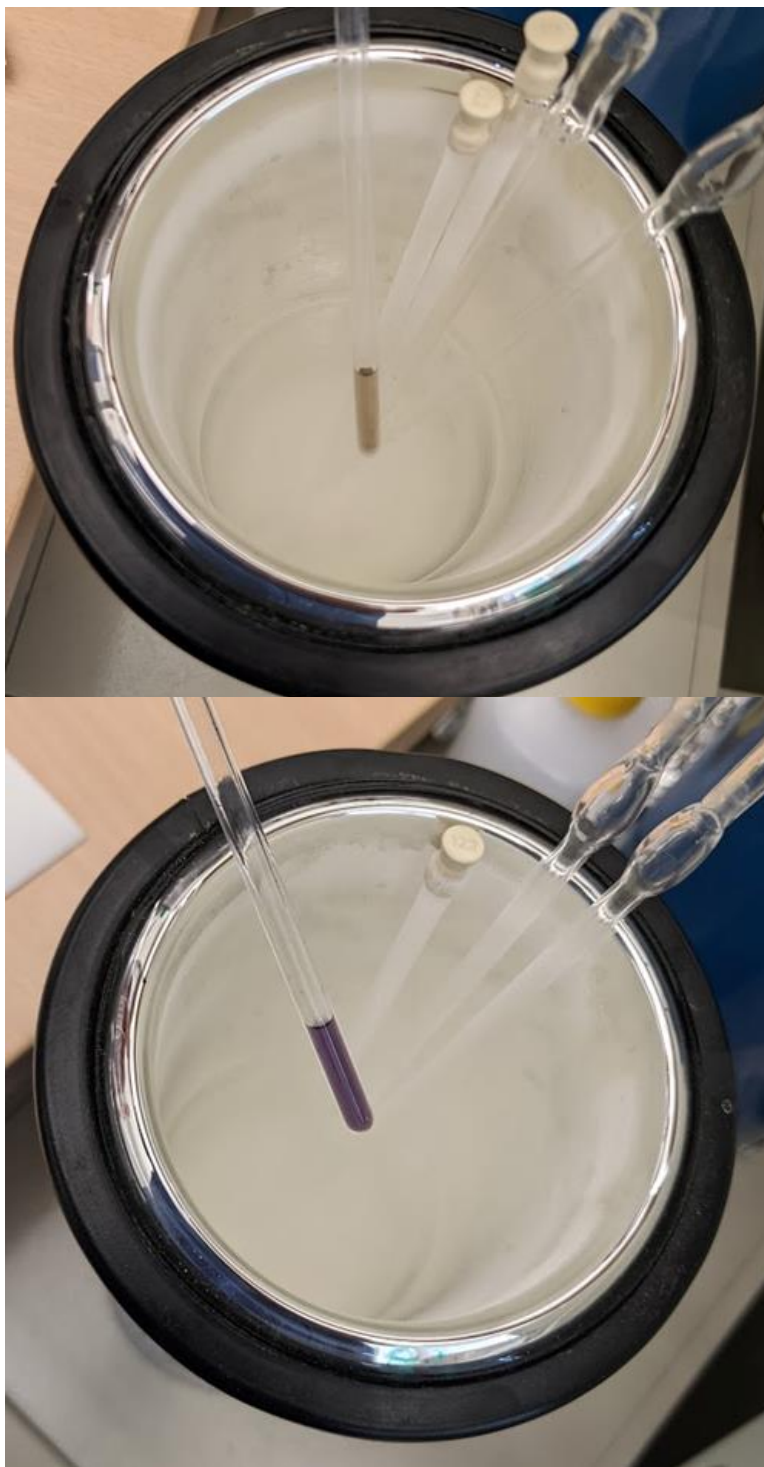

**Figure S21:** Color change of EPR sample of **2** in DCM solution ( $c = 1$  mM) after freezing in liquid nitrogen right after the frozen solution has melted (top;  $T > 176$  K) and after warming up to RT (bottom).

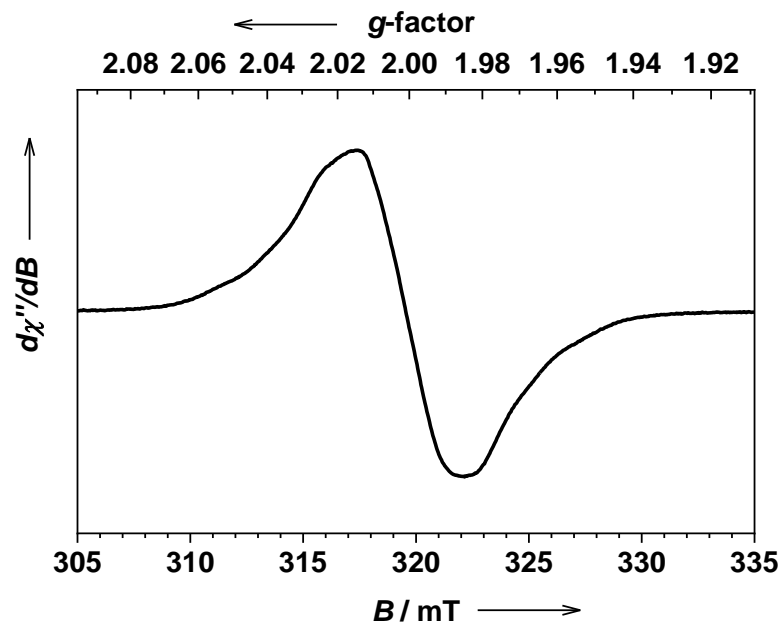

**Figure S22:** X-band EPR spectrum of **1** in frozen DCM solution ( $c = 1$  mM) recorded at 95 K (frequency: 8.948 GHz, mod with: 0.5 mT, power: 1.0 mW).

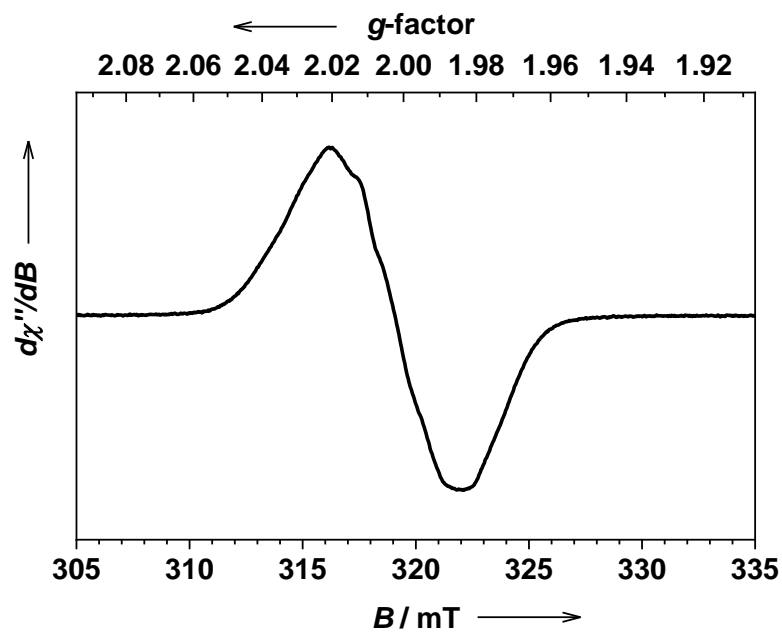

**Figure S23:** X-band EPR spectrum of **3** in frozen DCM solution ( $c = 1$  mM) recorded at 95 K. Top: frequency: 8.9426 GHz, mod with: 1.0 mT, power: 1.0 mW.



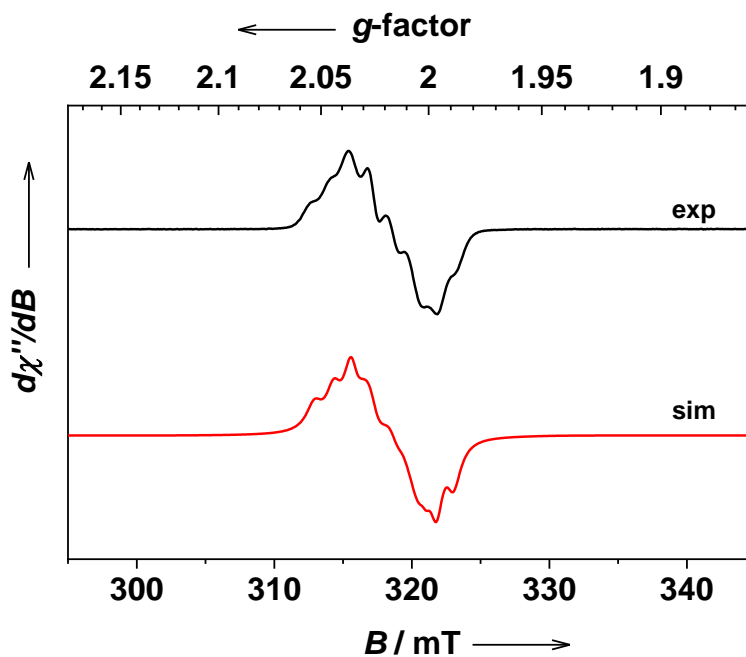

**Figure S24:** X-band EPR spectrum of *in-situ* generated **3** in frozen DCM solution ( $c = 1 \text{ mM}$ ) recorded at 103 K. Frequency: 8.9336 GHz, mod width: 0.05 mT, power: 1.0 mW. Fit parameters:  $g = (2.0174, 2.0076, 1.9916)$ ,  $A(^{59}\text{Co}, I = 7/2) = (2.04, 13.4, 2.2) \cdot 10^{-4} \text{ cm}^{-1}$ , linewidths  $W_{x,y,z} = (0.81, 0.85, 0.54) \cdot 10^{-4} \text{ cm}^{-1} / \text{GHz}$ . Experimental spectrum is shown in black, fit – in red.

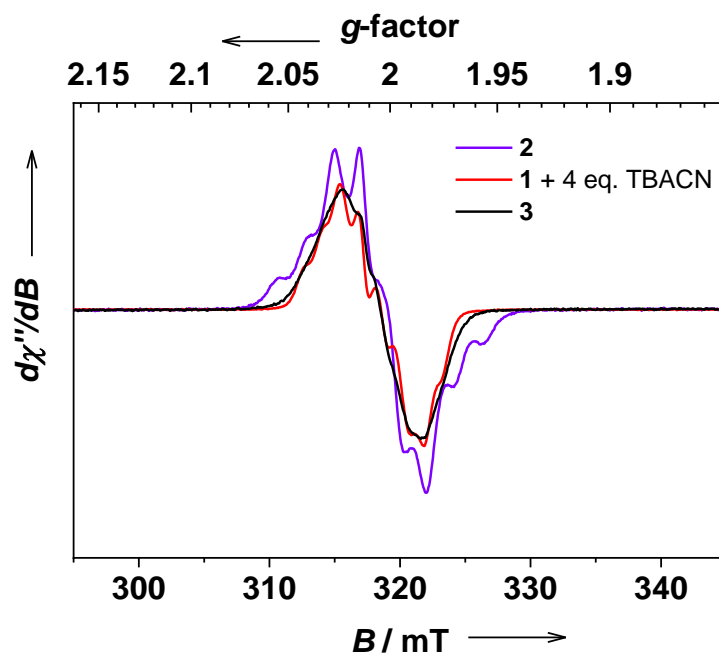

**Figure S25:** Comparison of X-band EPR spectra of the reference complex **3** (in black), *in-situ* formed **3** by reacting **1** with 4 eq. TBACN (in red), and *in-situ* formed **2** (in purple) all measured in DCM frozen solutions at ~100 K.

## IR Spectroscopy

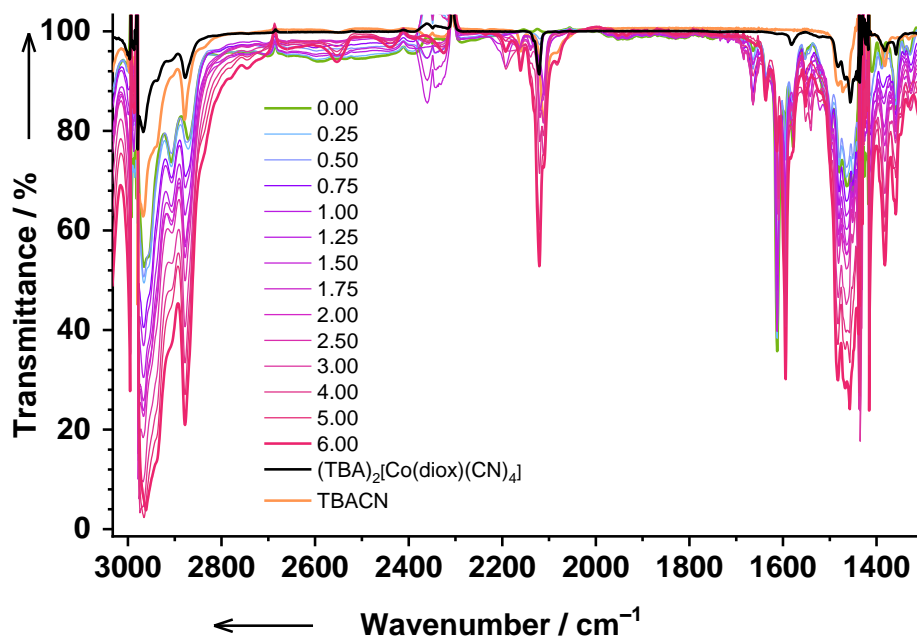

Figure S26: Changes in IR spectrum of **1** in DCM solution ( $c = 2.5$  mM) upon titration with TBACN: overview.

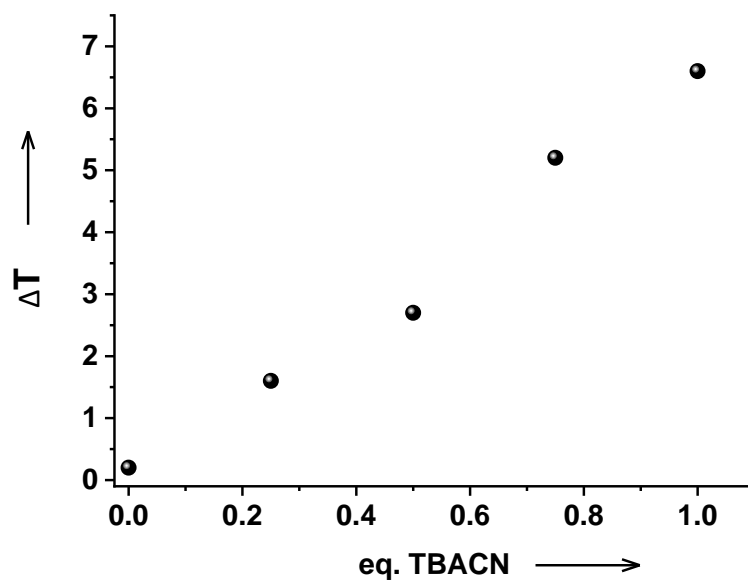

Figure S27: Changes in transmittance at  $2120 \text{ cm}^{-1}$  in IR spectrum of **1** in DCM ( $c = 2.5$  mM) upon titration with TBACN.

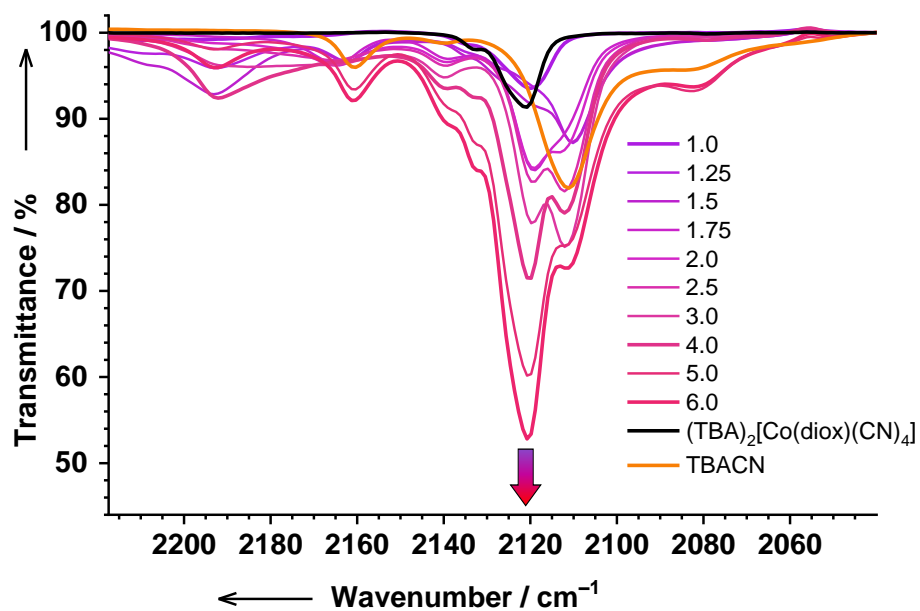

**Figure S28:** Evolution of IR spectrum of **1** in DCM ( $c = 2.5$  mM) titrated with TBACN.

# Mass Spectrometry

## Positive-Ion Mode

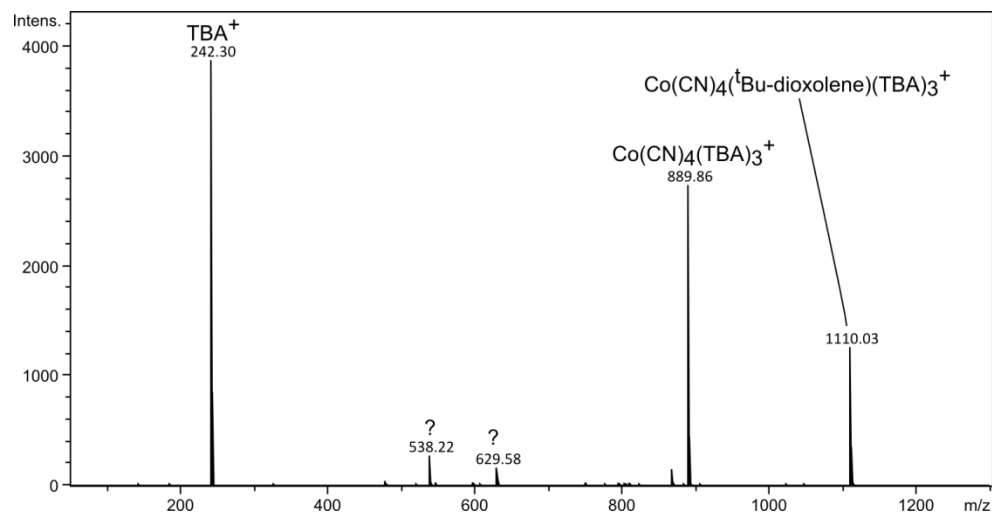

**Figure S29:** Positive-ion mode MS of the reference species (TBA)<sub>2</sub>[Co(<sup>t</sup>Bu-dioxolene)(CN)<sub>4</sub>] (**3**).

## Negative-Ion Mode

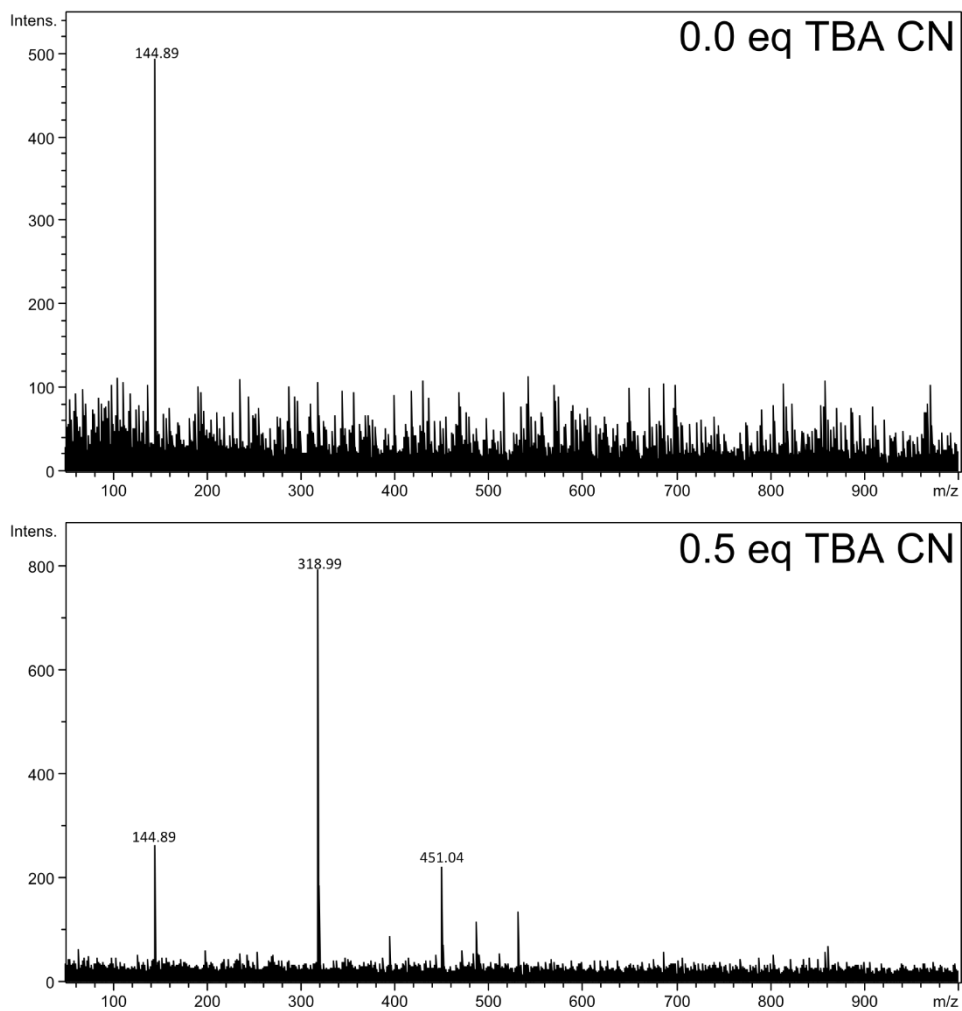

**Figure S30:** Negative ion mode MS of **1** with 0.0 (top) and 0.5 (bottom) eq. TBACN.

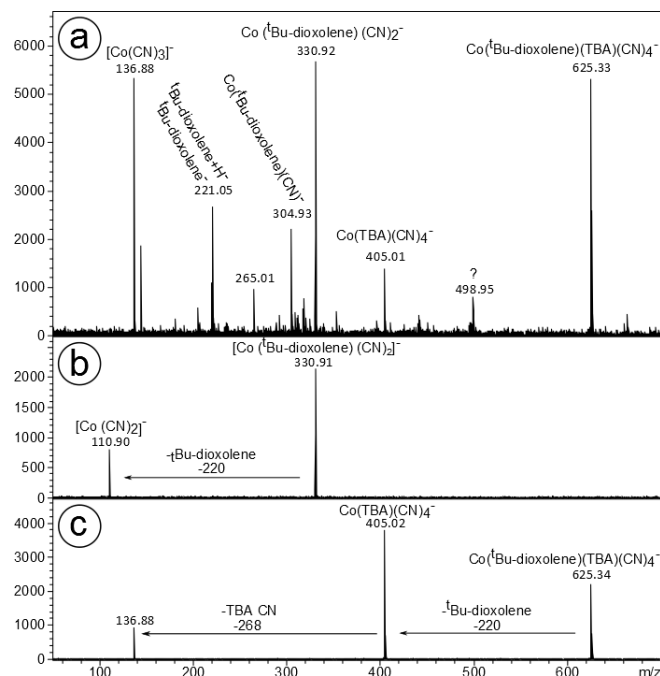

**Figure S31:** a) Negative ion mode MS of **1** with 1 eq. TBACN and the corresponding MS/MS of the signal at b) m/z 331 and c) m/z 625.

The ions at 0.0 and 0.5 eq. TBACN did not show the characteristic fragmentation behaviour observed for all other Co-complexes, additionally no combination of Co with ligands was found that fit the proper mass. We conclude that no negatively charged Co-complexes are formed at 0.0 eq. of TBA CN and at 0.5 eq. of TBA CN. Only  $[\text{Co}(t\text{Bu-dioxolene})(\text{CN})_2]^-$  (m/z 330) could be found as a minor signal, the major signals could not be attributed to Co-containing ions. In the negative-ion mode the mass accuracy was in the range of about  $\pm m/z 0.1$ . The mass accuracy had not influence the ion generation, the shape of the isotope pattern or the results of MS/MS experiments. The mass accuracy in the positive-ion mode was in the range of  $\pm m/z 0.01$ .

## Isotope patterns

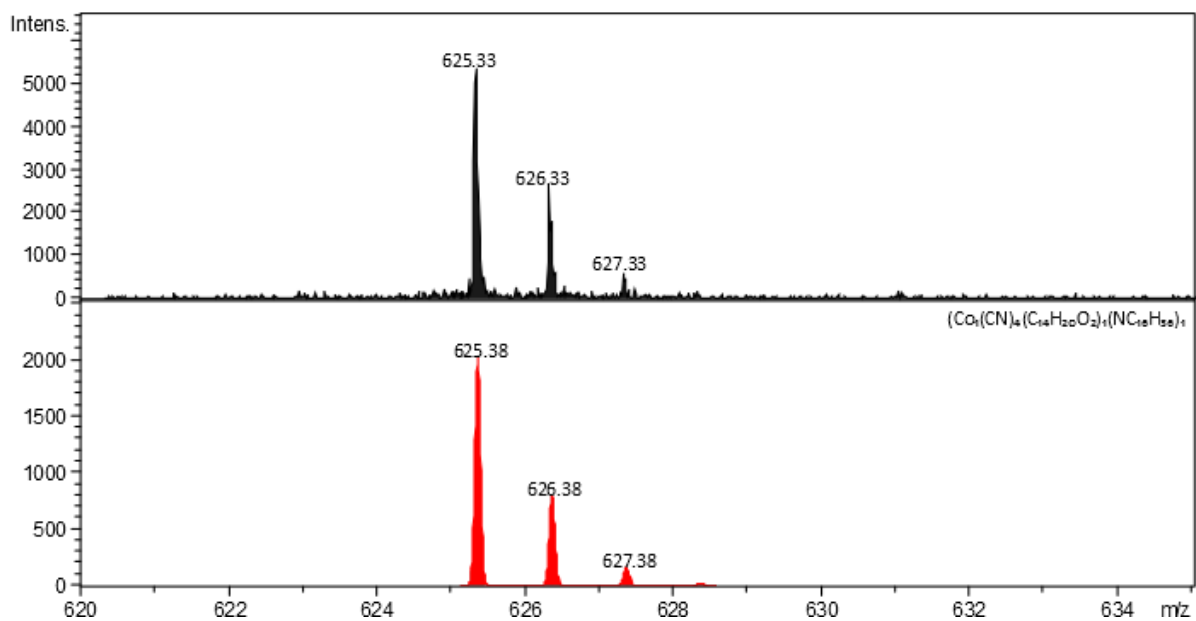

**Figure S32:** Experimental (top) and simulated (bottom) isotope pattern of  $[\text{Co}(\text{tBu-dioxolene})(\text{TBA})(\text{CN})_4]^-$ .

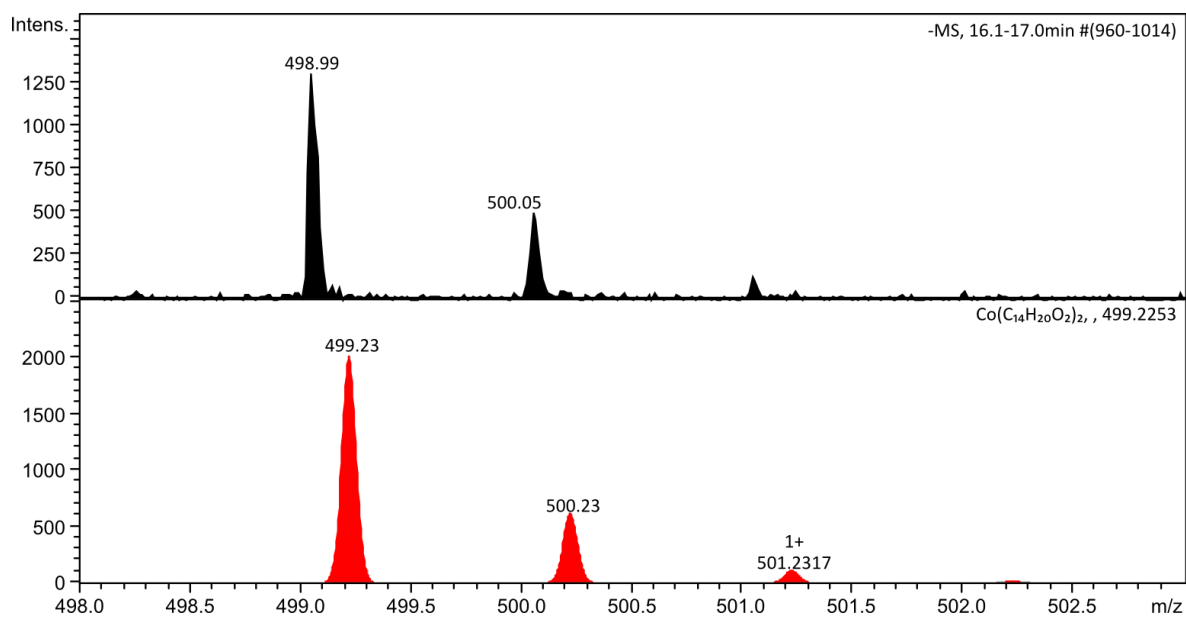

**Figure S33:** Experimental (top) and simulated (bottom) isotope pattern of  $[\text{Co}(\text{tBu-dioxolene})_2]^-$ .



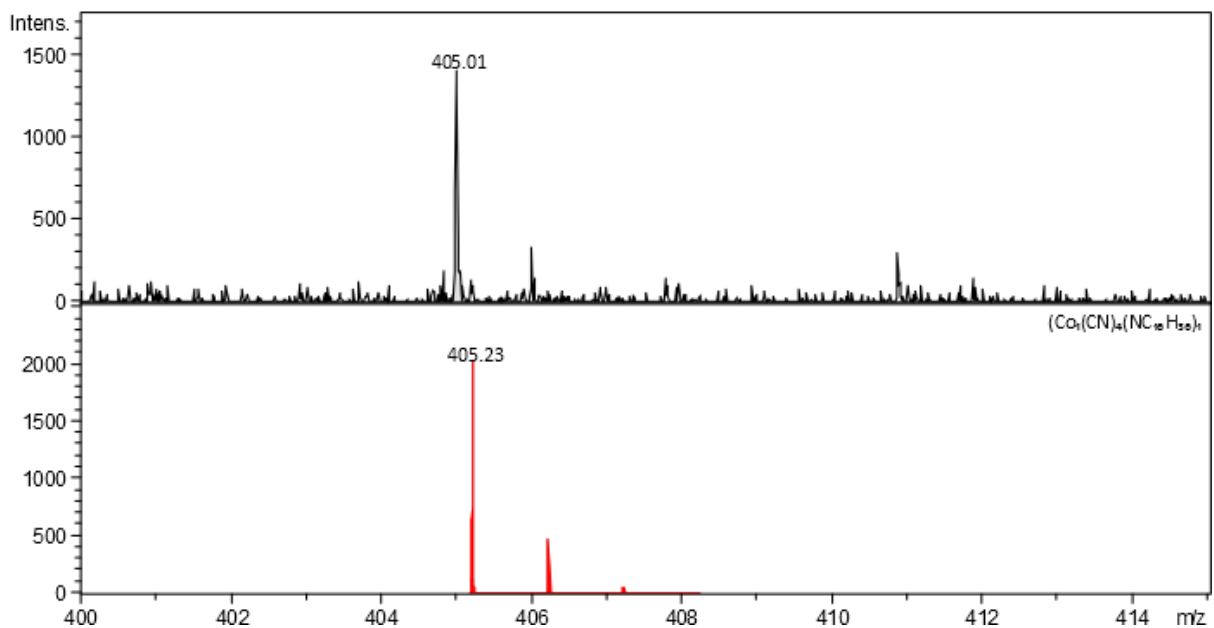

**Figure S34:** Experimental (top) and simulated (bottom) isotope pattern of  $[\text{Co}(\text{TBA})(\text{CN})_4]^-$ .

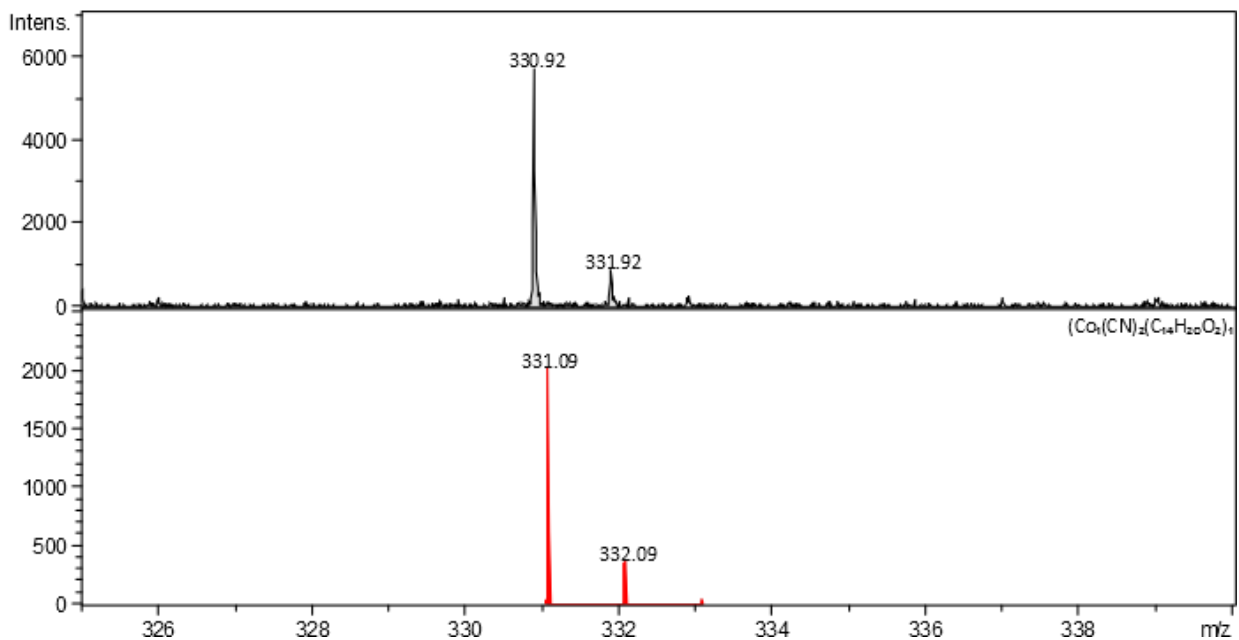

**Figure 35:** Experimental (top) and simulated (bottom) isotope pattern of  $[\text{Co}(\text{tBu-dioxolene})(\text{CN})_2]^-$ .

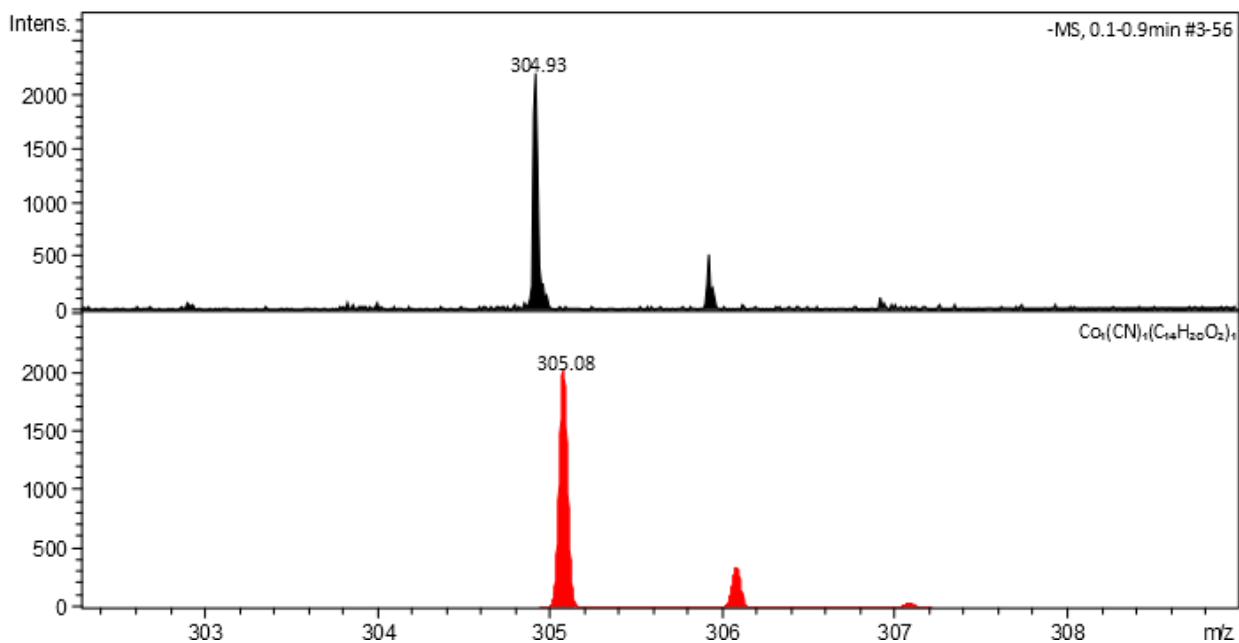

**Figure S36:** Experimental (top) and simulated (bottom) isotope pattern of  $[\text{Co}(\text{tBu-dioxolene})(\text{CN})]^-$ .

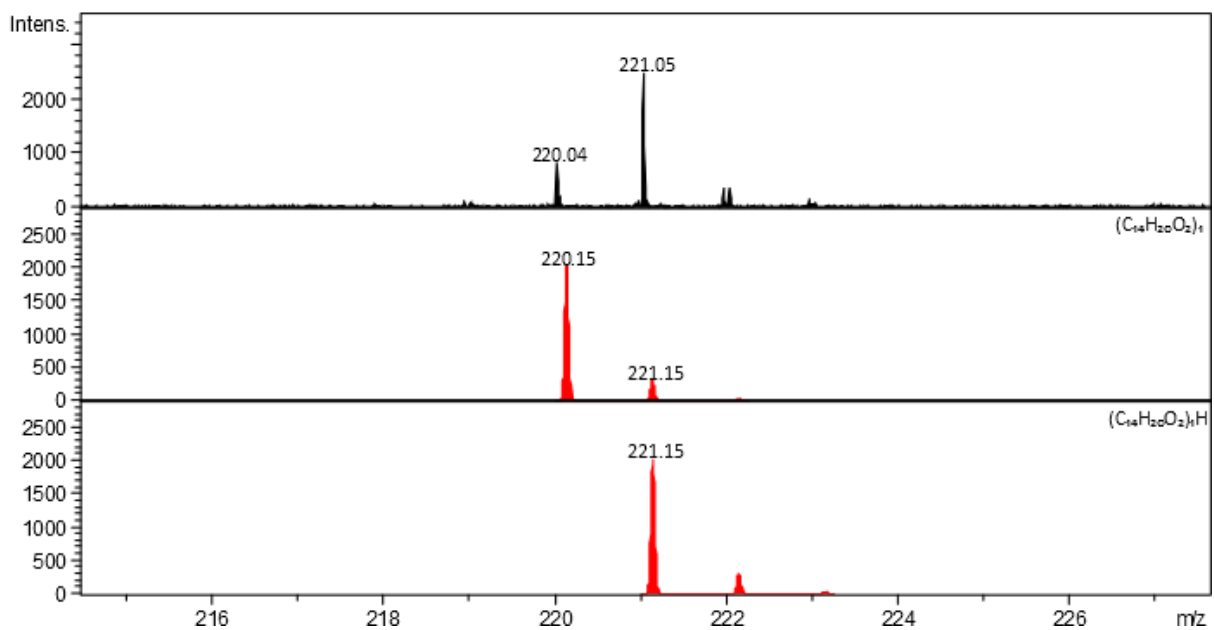

**Figure S37:** Experimental (top) and simulated (bottom) isotope pattern of  $(\text{tBu-dioxolene})^-$  and  $(\text{tBu-dioxolene}+\text{H})^-$ .

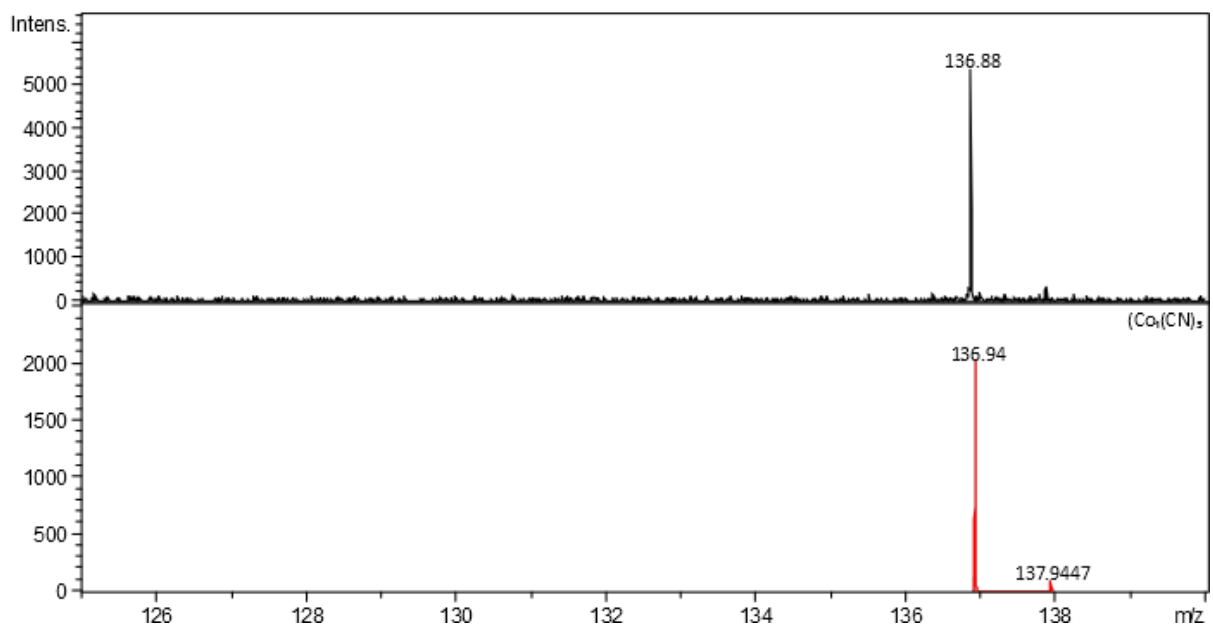

**Figure S38:** Experimental (top) and simulated (bottom) isotope pattern of  $[\text{Co}(\text{CN})_3]^-$ .

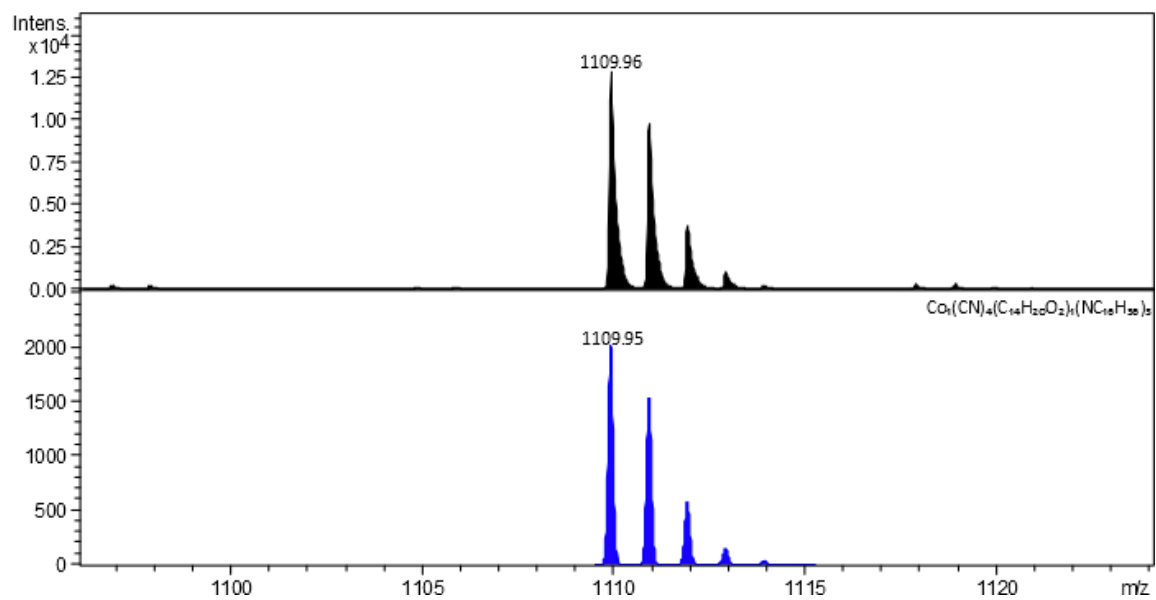

**Figure S39:** Experimental (top) and simulated (bottom) isotope pattern of  $[\text{Co}(\text{tBu-dioxolene})(\text{CN})_4(\text{TBA})_3]^+$ .

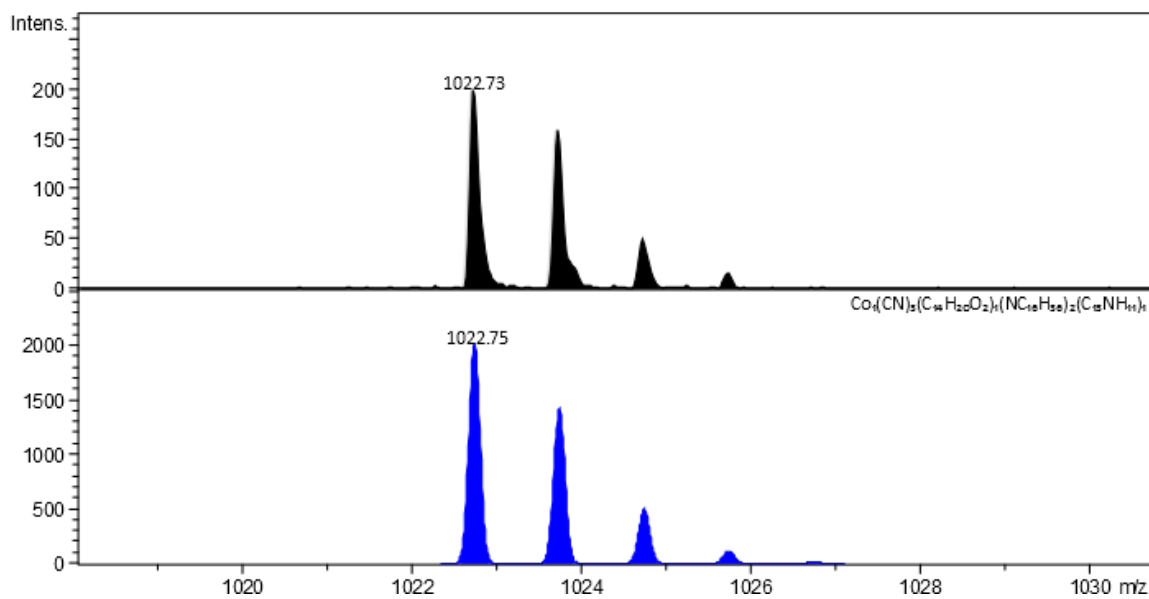

**Figure S40:** Experimental (top) and simulated (bottom) isotope pattern of  $[\text{Co}(\text{tBu-dioxolene})(\text{stypy})(\text{CN})_3(\text{TBA})_2]^+$ .

## Theoretical Calculations

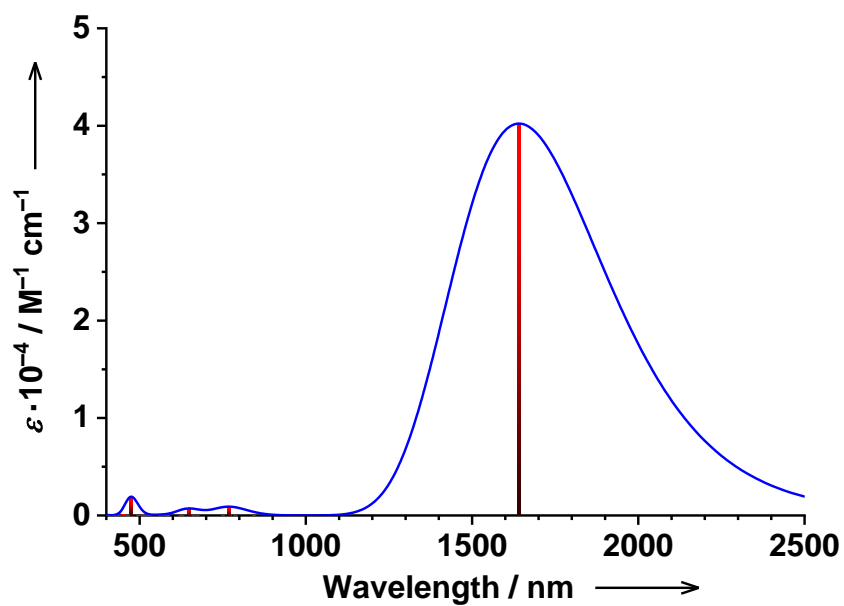

**Figure S41:** Calculated electronic absorption spectrum of the parent complex **1** in a  $ls\text{-Co}^{\text{III}}(\text{SQ}^+)(\text{Cat}^{2-})$  state: TD-DFT, B3LYP,  $S = 1/2$ . A prominent IVCT band is clearly visible and dominates.

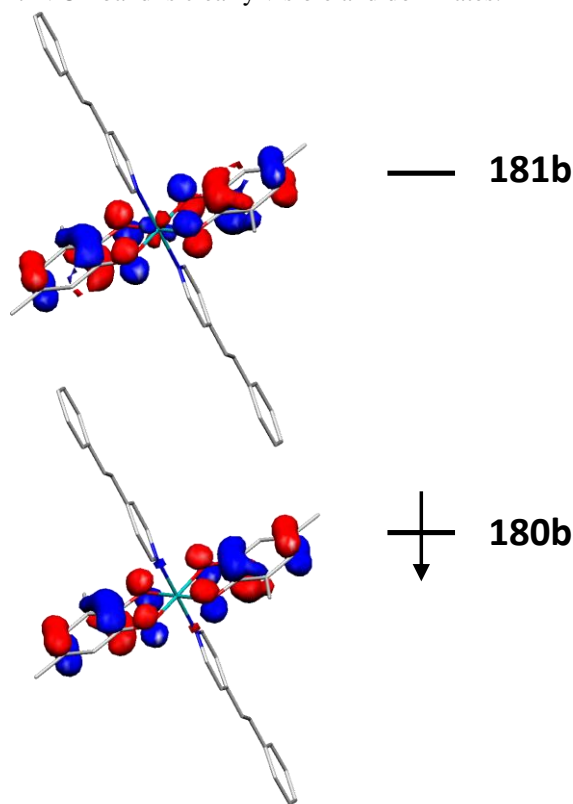

**Figure S42:** Donor and acceptor orbitals involved into the transition ( $1641 \text{ nm} = 6092 \text{ cm}^{-1}$ ) responsible for the prominent IVCT band of the parent complex **1** in a  $ls\text{-Co}^{\text{III}}(\text{SQ}^+)(\text{Cat}^{2-})$  state: TD-DFT, B3LYP,  $S = 1/2$ .

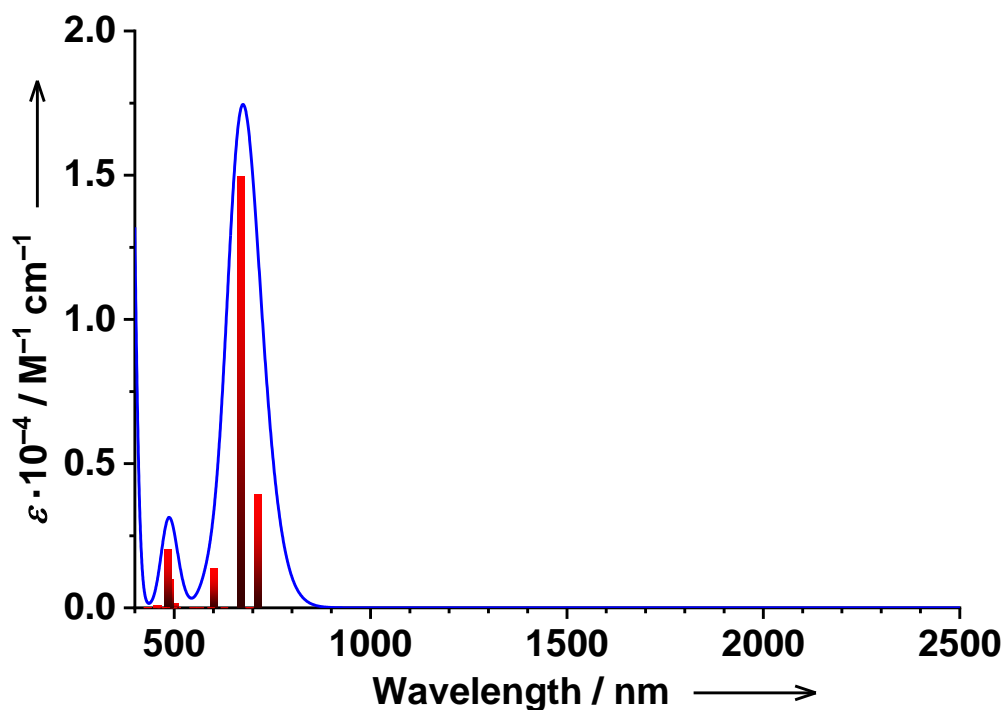

**Figure S43:** Calculated electronic absorption spectrum of the parent complex **1** in a  $hs\text{-Co}^{\text{II}}(\text{SQ}^+)_2$  state: TD-DFT, B3LYP,  $S = 5/2$ . The IVCT band is clearly absent.

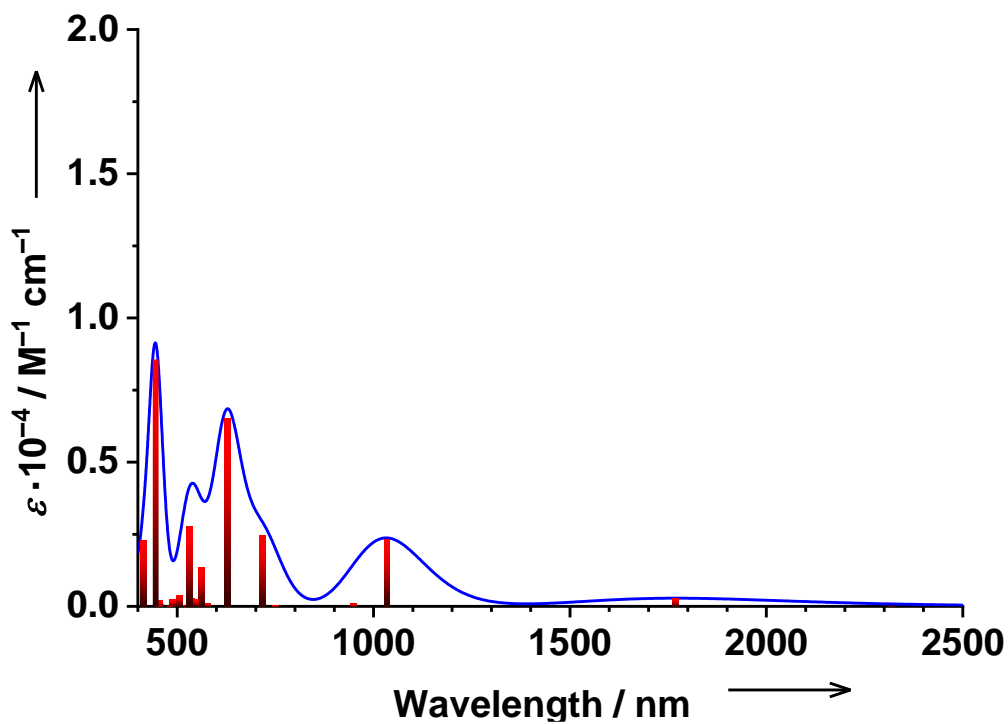

**Figure S44:** Calculated electronic absorption spectrum of the parent complex **1** dissociated to a five-coordinate  $[\text{Co}(\text{dioxolene})_2(\text{styryl})_1]$  in its  $hs\text{-Co}^{\text{II}}(\text{SQ}^+)_2$  state: TD-DFT, B3LYP,  $S = 5/2$ . It shows some similarities to the corresponding spectrum of the parent **1**.

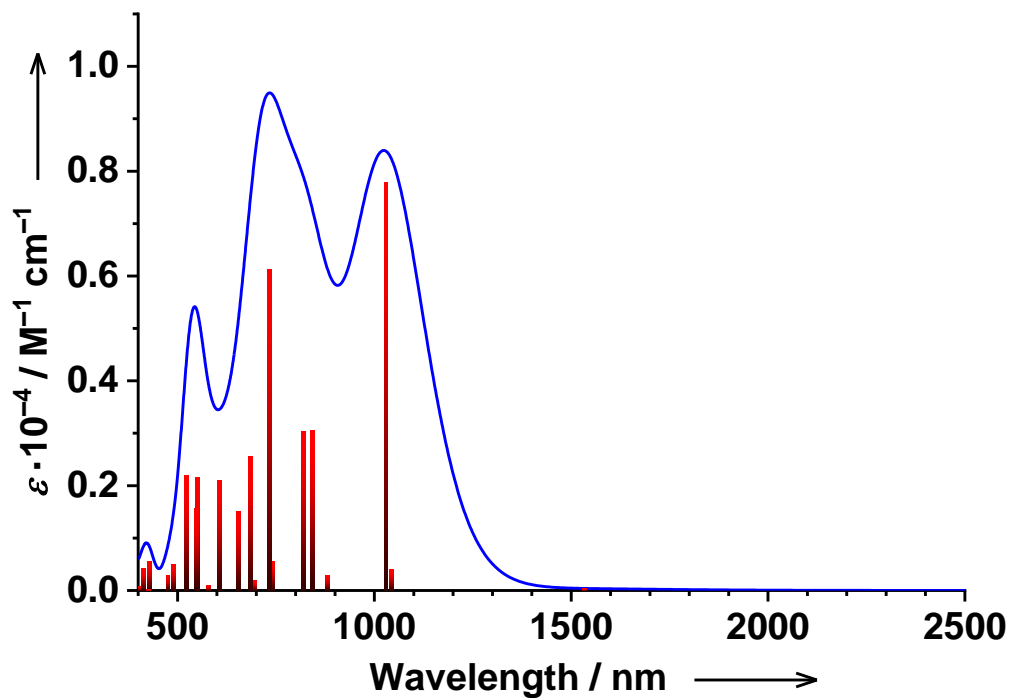

**Figure S45:** Calculated electronic absorption spectrum of the postulated five-coordinate species  $2^{\text{five}}$  in a  $ls\text{-Co}^{\text{II}}(\text{SQ}^{\cdot-})_2$  state: TD-DFT, B3LYP,  $S = 3/2$ . Strong features in visible and NIR are clearly visible.

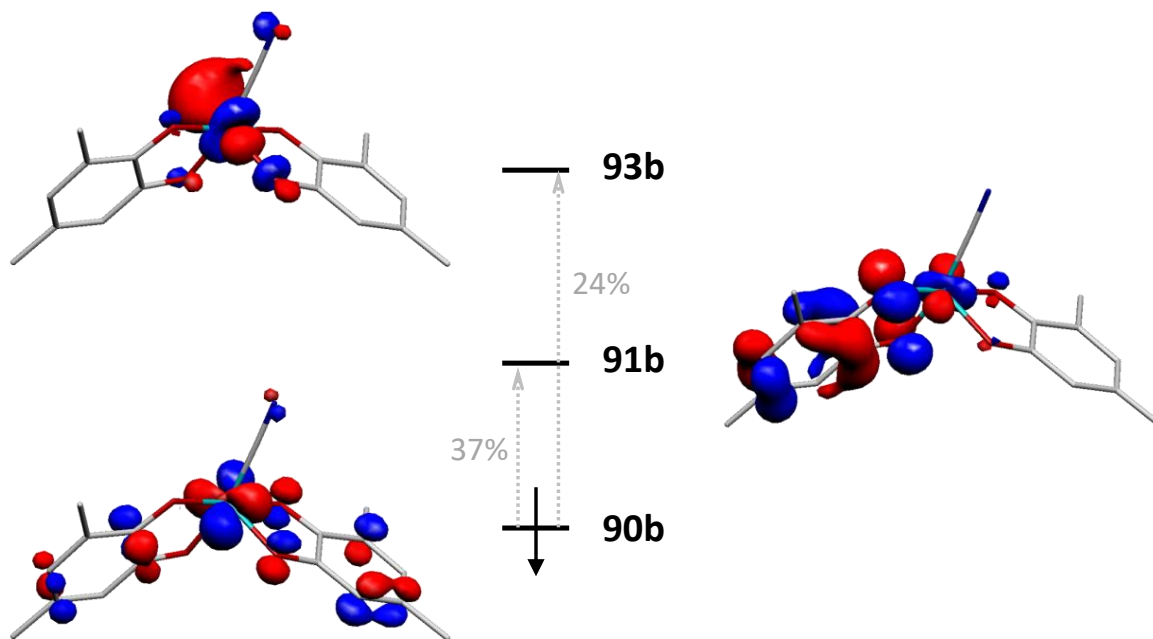

**Figure S46:** Molecular orbitals contributing the most to a prominent transition at  $1030 \text{ nm} = 9711 \text{ cm}^{-1}$  calculated for  $2^{\text{five}}$  in a  $ls\text{-Co}^{\text{II}}(\text{SQ}^{\cdot-})_2$  state: TD-DFT, B3LYP,  $S = 3/2$ . Strong LMCT character is visible.

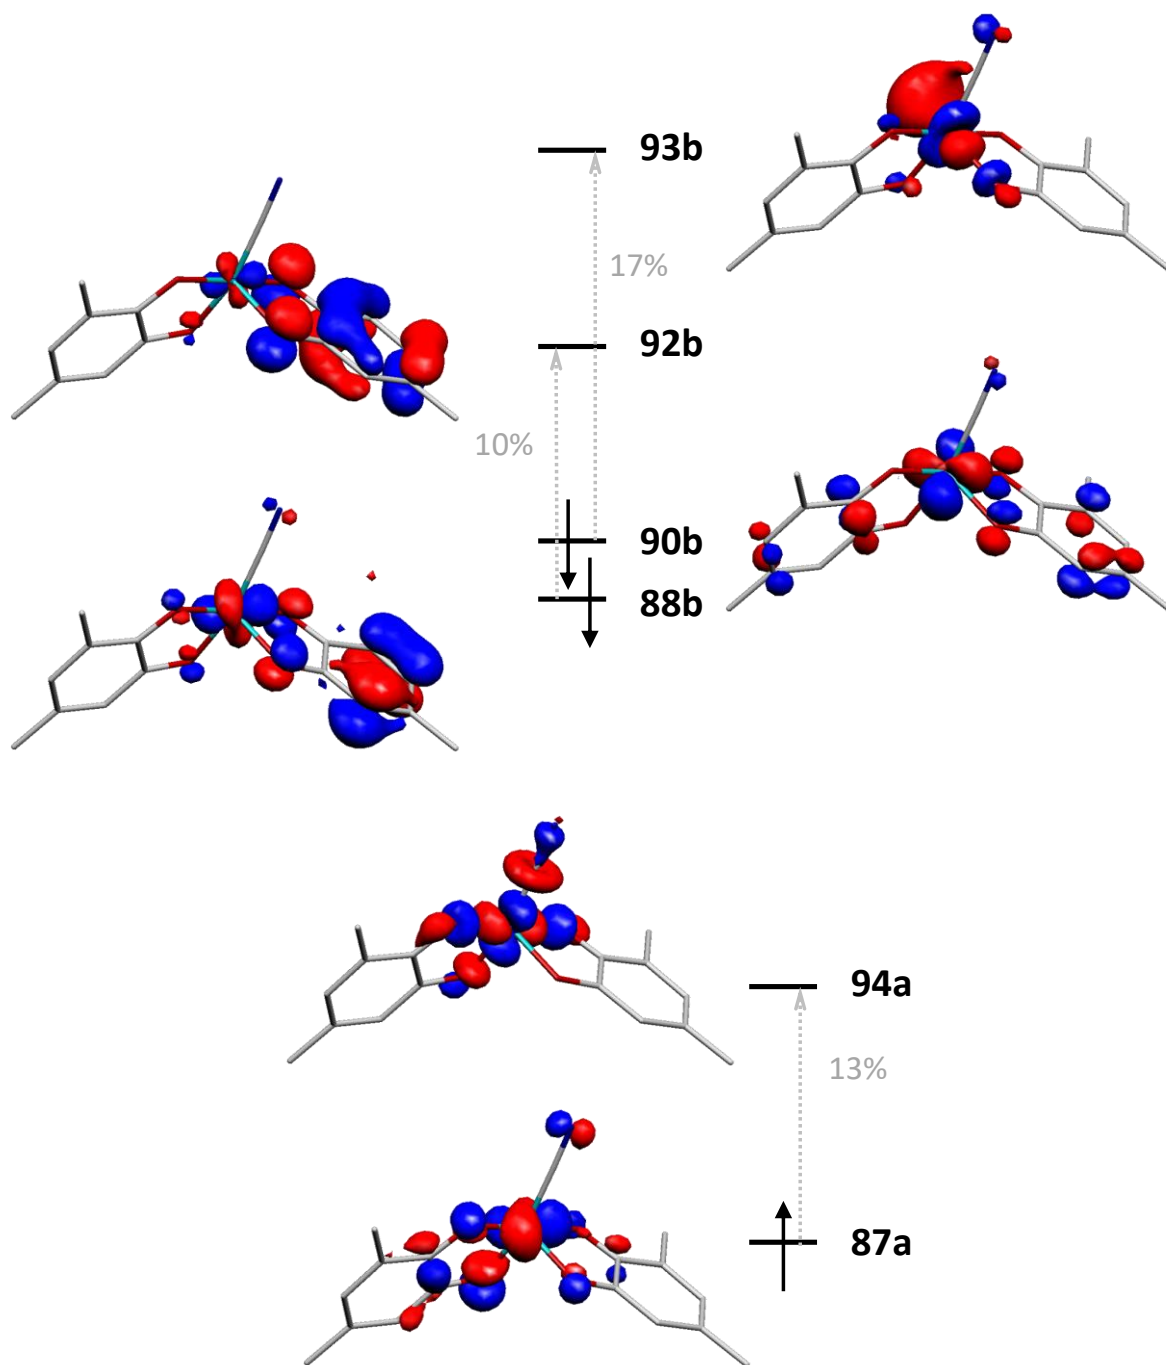

**Figure S47:** Molecular orbitals contributing the most to a prominent transition at 734 nm = 13619 cm<sup>-1</sup> calculated for **2<sup>five</sup>** in a *ls*-Co<sup>II</sup>(SQ<sup>-</sup>)<sub>2</sub> state: TD-DFT, B3LYP, *S* = 3/2.



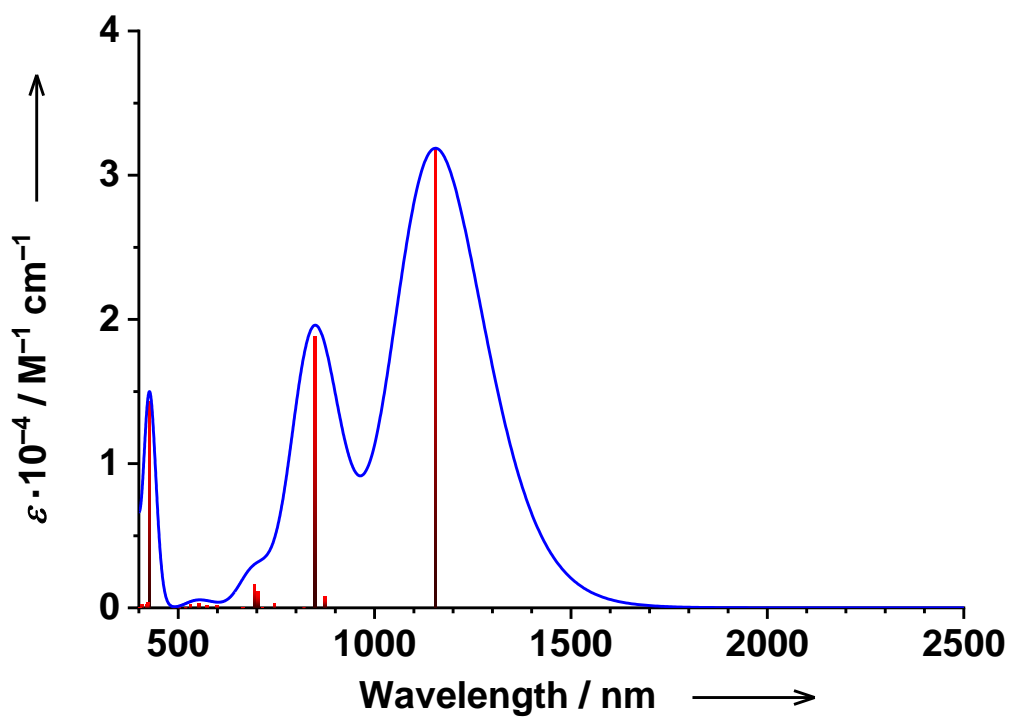

**Figure S48:** Calculated electronic absorption spectrum of the postulated five-coordinate species  $2^{\text{five}}$  in a  $ls\text{-Co}^{\text{III}}(\text{SQ}^+)(\text{Cat}^{2-})$  state: TD-DFT, B3LYP,  $S = 1/2$ . This species is presumable formed at low temperatures. Interestingly, the IVCT band becomes blue-shifted compared to the parent **1** (*vide infra*).

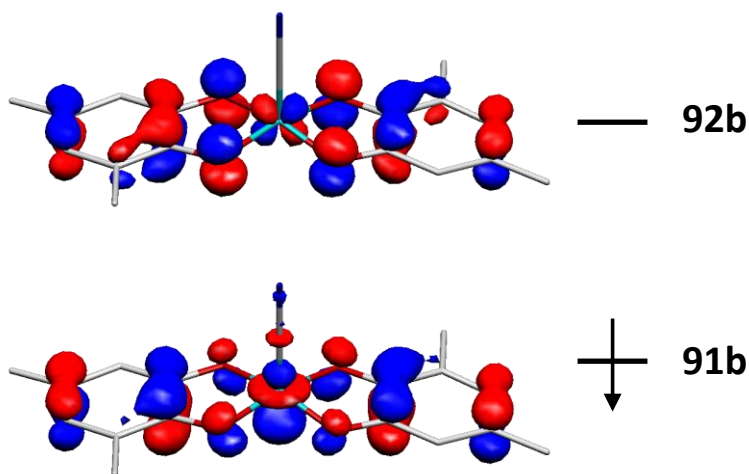

**Figure S49:** Donor and acceptor orbitals involved into the IVCT transition at  $1155 \text{ nm} = 8655 \text{ cm}^{-1}$  calculated for the postulated five-coordinate species  $2^{\text{five}}$  in a  $ls\text{-Co}^{\text{III}}(\text{SQ}^+)(\text{Cat}^{2-})$  state: TD-DFT, B3LYP,  $S = 1/2$ .

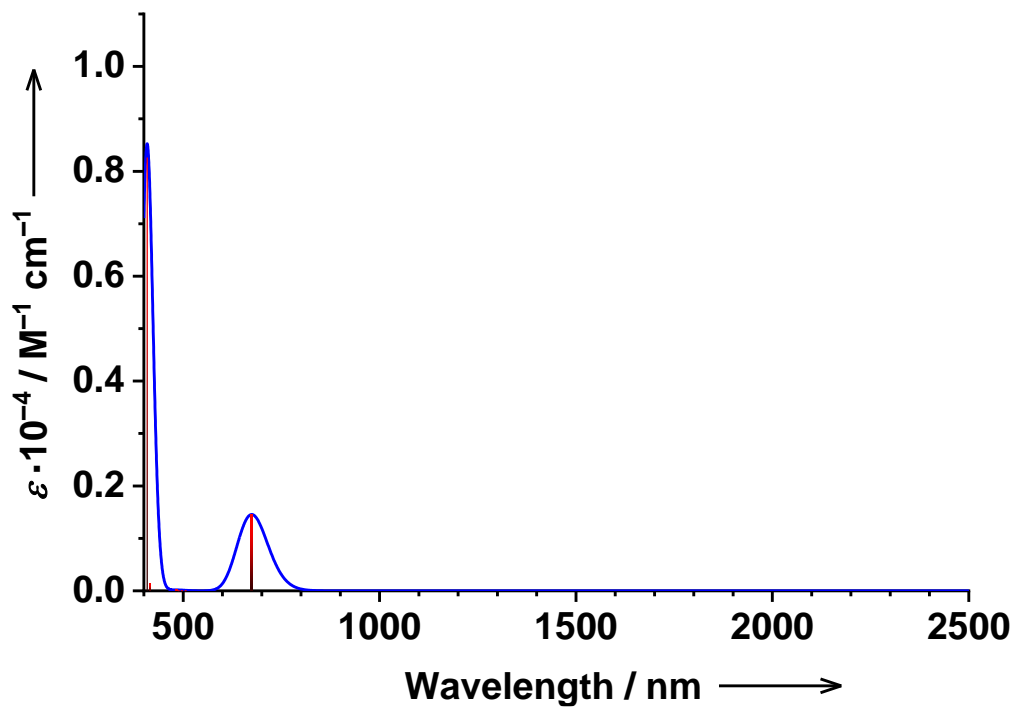

**Figure S50:** Calculated electronic absorption spectrum of the reference tetracyanido species **3** in a  $1s\text{-Co}^{\text{III}}(\text{SQ}^-)$  state: TD-DFT, B3LYP,  $S = 1/2$ . This is a very weak chromophore compared to other species in this work.

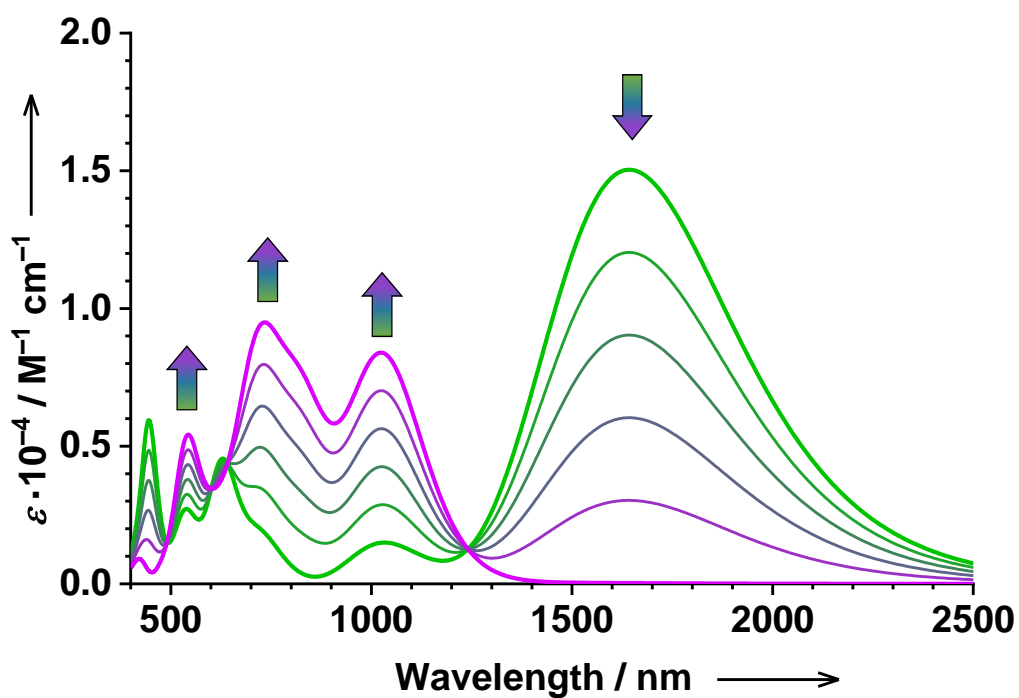

**Figure S51:** Simulated titration of **1** with TBACN (0...1 eq.): the evolution of calculated electronic absorption spectrum upon the conversion of the parent **1** (in green) to the postulated **2<sup>five</sup>** (in purple). Method: TD-DFT, B3LYP, **1** = 37% *ls*-Co<sup>III</sup>(SQ<sup>-</sup>)(Cat<sup>2-</sup>) as a six-coordinate species + 63% *hs*-Co<sup>II</sup>(SQ<sup>-</sup>)<sub>2</sub> as a five-coordinate dissociated species, **2<sup>five</sup>** = *ls*-Co<sup>II</sup>(SQ<sup>-</sup>)<sub>2</sub>, see ESI for further details.

**Table S3.** Calculated thermodynamic parameters.

|                                                                                 | Enthalpy<br>$H^0_{298}$ , kcal<br>mol <sup>-1</sup> | Enthalpy<br>$H^0_{298}$ , kJ<br>mol <sup>-1</sup> | Entropic<br>term $TS^0_{298}$ ,<br>kcal mol <sup>-1</sup><br>( $T = 298$ K) | Entropy<br>$S^0_{298}$ , J K <sup>-1</sup><br>mol <sup>-1</sup> | Gibbs free<br>energy $G^0_{298}$ ,<br>kcal mol <sup>-1</sup> | Gibbs free<br>energy $G^0_{298}$ ,<br>kJ mol <sup>-1</sup> | relative<br>energy,<br>kcal<br>mol <sup>-1</sup> |
|---------------------------------------------------------------------------------|-----------------------------------------------------|---------------------------------------------------|-----------------------------------------------------------------------------|-----------------------------------------------------------------|--------------------------------------------------------------|------------------------------------------------------------|--------------------------------------------------|
| <b>Co(dioxolene)<sub>2</sub>(stypy)<sub>2</sub></b>                             |                                                     |                                                   |                                                                             |                                                                 |                                                              |                                                            |                                                  |
| $S = 5/2$ ( <i>hs</i> )                                                         | -2142494.00                                         | -8964194.88                                       | 79.69                                                                       | 1118.3                                                          | -2142573.68                                                  | -8964528.29                                                | 5.8                                              |
| $S = 3/2$                                                                       | -2142492.51                                         | -8964188.64                                       | 78.92                                                                       | 1107.4                                                          | -2142571.42                                                  | -8964518.83                                                | 8.0                                              |
| $S = 1/2$ ( <i>ls</i> )                                                         | -2142503.52                                         | -8964234.72                                       | 75.95                                                                       | 1065.8                                                          | -2142579.47                                                  | -8964552.50                                                | 0.0                                              |
| <b>delta(<i>hs</i> – <i>ls</i>)</b>                                             | <b>9.52</b>                                         | <b>39.84</b>                                      | <b>3.74</b>                                                                 | <b>52.4</b>                                                     | <b>5.79</b>                                                  | <b>24.21</b>                                               |                                                  |
| <b>Co(dioxolene)<sub>2</sub>(stypy)<sub>1</sub></b>                             |                                                     |                                                   |                                                                             |                                                                 |                                                              |                                                            |                                                  |
| $S = 5/2$                                                                       | -1793627.43                                         | -7504537.16                                       | 63.39                                                                       | 889.6                                                           | -1793690.82                                                  | -7504802.39                                                | 3.0                                              |
| $S = 3/2$                                                                       | -1793630.37                                         | -7504549.47                                       | 62.16                                                                       | 872.3                                                           | -1793692.53                                                  | -7504809.54                                                | 1.3                                              |
| $S = 1/2$                                                                       | -1793633.73                                         | -7504563.55                                       | 60.08                                                                       | 843.1                                                           | -1793693.82                                                  | -7504814.92                                                | 0.0                                              |
| <b>delta(<i>hs</i> – <i>ls</i>)</b>                                             | <b>6.31</b>                                         | <b>26.38</b>                                      | <b>3.31</b>                                                                 | <b>46.4</b>                                                     | <b>3.00</b>                                                  | <b>12.54</b>                                               |                                                  |
| <b>Co(dioxolene)<sub>2</sub>(stypy)<sub>1</sub>(CN)<sub>1</sub><sup>-</sup></b> |                                                     |                                                   |                                                                             |                                                                 |                                                              |                                                            |                                                  |
| $S = 5/2$                                                                       | -1851922.10                                         | -7748442.07                                       | 66.70                                                                       | 936.1                                                           | -1851988.80                                                  | -7748721.16                                                | 14.7                                             |
| $S = 3/2$                                                                       | -1851927.87                                         | -7748466.22                                       | 65.04                                                                       | 912.8                                                           | -1851992.92                                                  | -7748738.36                                                | 10.6                                             |
| $S = 1/2$                                                                       | -1851940.24                                         | -7748517.97                                       | 63.29                                                                       | 888.2                                                           | -1852003.53                                                  | -7748782.79                                                | 0.0                                              |
| <b>delta(<i>hs</i> – <i>ls</i>)</b>                                             | <b>18.14</b>                                        | <b>75.90</b>                                      | <b>3.41</b>                                                                 | <b>47.8</b>                                                     | <b>14.73</b>                                                 | <b>61.63</b>                                               |                                                  |
| <b>Co(dioxolene)<sub>2</sub>(CN)<sub>1</sub><sup>-</sup></b>                    |                                                     |                                                   |                                                                             |                                                                 |                                                              |                                                            |                                                  |
| $S = 5/2$                                                                       | -1503059.49                                         | -6288800.91                                       | 50.46                                                                       | 708.2                                                           | -1503109.95                                                  | -6289012.05                                                | 13.9                                             |
| $S = 3/2$                                                                       | -1503068.18                                         | -6288837.28                                       | 47.81                                                                       | 670.9                                                           | -1503115.99                                                  | -6289037.32                                                | 7.9                                              |
| $S = 1/2$                                                                       | -1503077.38                                         | -6288875.74                                       | 46.50                                                                       | 652.5                                                           | -1503123.88                                                  | -6289070.30                                                | 0.0                                              |
| <b>delta(<i>hs</i> – <i>ls</i>)</b>                                             | <b>17.88</b>                                        | <b>74.83</b>                                      | <b>3.96</b>                                                                 | <b>55.6</b>                                                     | <b>13.92</b>                                                 | <b>58.25</b>                                               |                                                  |
| <b>Co(dioxolene)(CN)<sub>4</sub><sup>2-</sup></b>                               |                                                     |                                                   |                                                                             |                                                                 |                                                              |                                                            |                                                  |
| $S = 5/2$                                                                       | -1389342.77                                         | -5813010.17                                       | 47.23                                                                       | 662.7                                                           | -1389390.00                                                  | -5813207.76                                                | 66.3                                             |
| $S = 3/2$                                                                       | -1389379.87                                         | -5813165.36                                       | 45.02                                                                       | 631.7                                                           | -1389424.88                                                  | -5813353.70                                                | 31.4                                             |
| $S = 1/2$                                                                       | -1389414.00                                         | -5813308.19                                       | 42.32                                                                       | 593.9                                                           | -1389456.32                                                  | -5813485.26                                                | 0.0                                              |
| <b>delta(<i>hs</i> – <i>ls</i>)</b>                                             | <b>71.23</b>                                        | <b>298.02</b>                                     | <b>4.91</b>                                                                 | <b>68.8</b>                                                     | <b>66.32</b>                                                 | <b>277.50</b>                                              |                                                  |

**Optimized geometry for Co(dioxolene)<sub>2</sub>(stypy)<sub>2</sub>:  $S = 5/2$ ,  $\langle S^2 \rangle = 8.769837$**

|    |                   |                   |                  |
|----|-------------------|-------------------|------------------|
| Co | 2.58943963968932  | 3.54459114106615  | 5.65798584530312 |
| O  | 3.92714883069696  | 4.51140075913626  | 4.46663849691106 |
| O  | 2.24427165119508  | 2.57131533748846  | 3.89780511118532 |
| C  | 3.93454618696222  | 4.06913486203103  | 3.24802737036923 |
| C  | 4.79708461156758  | 4.56350063107102  | 2.23484689021442 |
| C  | 4.72767355629687  | 4.05780051378853  | 0.93829572379636 |
| C  | 3.77760932531532  | 3.03177698887085  | 0.64258268982714 |
| C  | 2.90835189023920  | 2.49741713187551  | 1.58921434360935 |
| C  | 2.98078261543464  | 3.00761379170420  | 2.92714044882857 |
| C  | 1.91972703415453  | 1.41791720567404  | 1.25730480603621 |
| N  | 1.05910389346050  | 5.10484715946873  | 5.14176915022553 |
| C  | 1.32751931283271  | 6.41821948855235  | 5.24010342607208 |
| C  | 0.40213230954112  | 7.41273520584720  | 4.93476801168335 |
| C  | -0.89627028047787 | 7.07090873565482  | 4.49466263978465 |
| C  | -1.16264266244733 | 5.68623207777363  | 4.39566909852792 |
| C  | -0.17508075725982 | 4.76360021351930  | 4.72322040279882 |
| C  | -1.84936299153897 | 8.13133293203597  | 4.18039197675584 |
| C  | -3.13030435170950 | 7.96992811578985  | 3.74634241199953 |
| C  | -4.10333720718744 | 9.01319891913277  | 3.42490752827369 |
| C  | -3.84122764648227 | 10.40038970602619 | 3.53405770528506 |
| C  | -4.81819880052731 | 11.34249543390924 | 3.20974676482563 |
| C  | -6.08489671243968 | 10.93197465274691 | 2.76696729900798 |
| C  | -6.36483992763337 | 9.56476419763703  | 2.65222599835594 |

|   |                   |                   |                   |
|---|-------------------|-------------------|-------------------|
| C | -5.38736784997794 | 8.62041886466707  | 2.97698197153197  |
| O | 1.25191607646135  | 2.57732263571273  | 6.84890057845161  |
| O | 2.93441592554899  | 4.51748336423672  | 7.41868124267997  |
| C | 1.24518170415140  | 3.01827599138711  | 8.06799636791682  |
| C | 0.38356297664291  | 2.52240874724157  | 9.08122755553318  |
| C | 0.45363975931801  | 3.02671619293735  | 10.37827875438456 |
| C | 1.40342441944907  | 4.05287581341821  | 10.67442691985702 |
| C | 2.27178625674845  | 4.58866531026176  | 9.72777981842550  |
| C | 2.19872041518092  | 4.07985846467536  | 8.38935355038289  |
| C | -0.44317526772728 | 2.51570386189501  | 11.47146869660891 |
| C | 3.26015167847434  | 5.66824782606985  | 10.06019171437531 |
| N | 4.12049765316242  | 1.98480109415163  | 6.17450752211817  |
| C | 3.85265523811281  | 0.67130812717790  | 6.07624140170972  |
| C | 4.77841493806278  | -0.32279669627454 | 6.38180303533810  |
| C | 6.07659808591804  | 0.01961190082536  | 6.82210029663625  |
| C | 6.34237370342125  | 1.40441047241798  | 6.92100520512811  |
| C | 5.35447793320827  | 2.32659649643286  | 6.59320911327733  |
| C | 7.03008798098547  | -1.04037591891216 | 7.13664607854190  |
| C | 8.31081216704228  | -0.87836491553459 | 7.57110740678463  |
| C | 9.28424587545245  | -1.92116316061554 | 7.89285887357395  |
| C | 9.02288549655092  | -3.30848231598899 | 7.78353675314114  |
| C | 10.00021075013779 | -4.25010569036243 | 8.10818309626189  |
| C | 11.26652665259133 | -3.83896256180833 | 8.55147757252296  |
| C | 11.54572996374235 | -2.47161537824699 | 8.66639267249651  |

|   |                   |                   |                   |
|---|-------------------|-------------------|-------------------|
| C | 10.56790454556852 | -1.52775289576527 | 8.34129816886074  |
| C | 5.62559995242592  | 4.56709671006758  | -0.15478259880110 |
| H | 5.51330333950495  | 5.35408905412728  | 2.49441004432809  |
| H | 3.73426306168240  | 2.64515393044546  | -0.38571534048214 |
| H | 2.33493871902271  | 6.68345308116087  | 5.58172746112166  |
| H | 0.69461894848826  | 8.46524630584981  | 5.04073627369875  |
| H | -2.13690038799429 | 5.30938667479012  | 4.06459296263235  |
| H | -0.37993598026754 | 3.68874756494992  | 4.64805895552262  |
| H | -1.45448029495896 | 9.14725339472862  | 4.32056794168855  |
| H | -3.51183831213761 | 6.94769809871940  | 3.60910119108925  |
| H | -2.86092509530433 | 10.75266251937955 | 3.87784844672386  |
| H | -4.58993577090328 | 12.41321536269255 | 3.30324556782600  |
| H | -6.85039089580326 | 11.67802312140949 | 2.51295943892004  |
| H | -7.35276327077856 | 9.23015036206213  | 2.30705227408974  |
| H | -5.61654817347341 | 7.54977144780033  | 2.88375144555582  |
| H | -0.33247068952301 | 1.73177597251207  | 8.82128817351211  |
| H | 1.44729898658735  | 4.43841611871988  | 11.70311008117625 |
| H | 2.84539976714858  | 0.40561773959798  | 5.73448574544148  |
| H | 4.48638943680802  | -1.37544044072549 | 6.27587760268347  |
| H | 7.31642310485320  | 1.78169794381913  | 7.25219115673037  |
| H | 5.55887899207247  | 3.40153987134549  | 6.66829729944396  |
| H | 6.63572384936206  | -2.05648180602987 | 6.99635276562064  |
| H | 8.69180391478596  | 0.14404684982473  | 7.70849843347599  |
| H | 8.04289927863862  | -3.66124040217978 | 7.43934095452435  |

|   |                   |                   |                   |
|---|-------------------|-------------------|-------------------|
| H | 9.77253016398112  | -5.32093700448512 | 8.01454034610295  |
| H | 12.03230065848035 | -4.58463413042262 | 8.80574853831251  |
| H | 12.53334800545141 | -2.13651492552107 | 9.01196739036757  |
| H | 10.79650406029283 | -0.45699288388006 | 8.43466313205961  |
| H | 5.03517597140223  | 4.98862570898948  | -0.99403141376990 |
| H | 6.23842206939464  | 3.74780324788351  | -0.58349327882763 |
| H | 6.31219758132184  | 5.35296276263251  | 0.20870975423492  |
| H | 0.88109672794468  | 1.74356974620778  | 1.46802138689069  |
| H | 2.09153624077828  | 0.51125165203283  | 1.87180734539578  |
| H | 1.98160197486637  | 1.12991462465434  | 0.19226613858493  |
| H | 3.08777758243559  | 6.57535449085077  | 9.44650293004719  |
| H | 4.29881703696278  | 5.34313928103755  | 9.84879333586219  |
| H | 3.19860920349367  | 5.95533696020557  | 11.12549611949083 |
| H | -1.05542079878268 | 3.33433526659926  | 11.90225092043242 |
| H | 0.14812033691076  | 2.09266880797464  | 12.30935228260277 |
| H | -1.13024674807960 | 1.73051759937353  | 11.10740313347502 |



**Optimized geometry for Co(dioxolene)<sub>2</sub>(stypy)<sub>2</sub>:  $S = 3/2$ ,  $\langle S^2 \rangle = 3.773054$**

|    |                   |                   |                  |
|----|-------------------|-------------------|------------------|
| Co | 2.52945976138264  | 3.44244985208652  | 5.58763722364162 |
| O  | 3.82988855766512  | 4.36906206577096  | 4.53456730044070 |
| O  | 2.11238590798055  | 2.51180423293885  | 4.04731156905121 |
| C  | 3.80383428546701  | 3.92327687344252  | 3.29332096404301 |
| C  | 4.64022601358413  | 4.39510784271074  | 2.26252956437071 |
| C  | 4.53100606922747  | 3.85121760419324  | 0.97420679425959 |
| C  | 3.57444039087966  | 2.82917866342908  | 0.72629700998783 |
| C  | 2.72357344045947  | 2.32845872212269  | 1.71536780693608 |
| C  | 2.84890621421593  | 2.89020985706970  | 3.01665127549287 |
| C  | 1.71635160710988  | 1.24886544436053  | 1.44483910519387 |
| N  | 0.99029308912831  | 5.14332381254200  | 5.06624094719303 |
| C  | 1.31558996773961  | 6.44190856129525  | 5.16344137373379 |
| C  | 0.42665466905083  | 7.47635953912767  | 4.87967462225125 |
| C  | -0.89374838223750 | 7.18896453146633  | 4.46729900261358 |
| C  | -1.21960444700146 | 5.81715918099626  | 4.36843325530962 |
| C  | -0.26255430900187 | 4.85332943474290  | 4.67197972516696 |
| C  | -1.80884827591803 | 8.29038859746275  | 4.17953314855060 |
| C  | -3.11173133959919 | 8.18743790185058  | 3.79650846730663 |
| C  | -4.04624958251249 | 9.27488690247876  | 3.50744800509893 |
| C  | -3.70633867487895 | 10.64795616771506 | 3.57016474269900 |
| C  | -4.65058550367448 | 11.63437997283558 | 3.28263314222876 |
| C  | -5.96108931483281 | 11.28359042427500 | 2.92399771443339 |
| C  | -6.31780933574529 | 9.93123680659800  | 2.85553577416910 |

|   |                   |                   |                   |
|---|-------------------|-------------------|-------------------|
| C | -5.37283483083251 | 8.94260118074942  | 3.14271335349790  |
| O | 1.26042582888563  | 2.51327193082118  | 6.55451333020263  |
| O | 2.91234848007940  | 4.37560424870169  | 7.21806030162179  |
| C | 1.21291047855466  | 2.89460952250275  | 7.82129026411831  |
| C | 0.32880293999578  | 2.33769674303858  | 8.76988694612977  |
| C | 0.34925364478952  | 2.80605970340036  | 10.08626138186002 |
| C | 1.26816143297994  | 3.83733645059304  | 10.42762222925348 |
| C | 2.16207898687762  | 4.41682157006774  | 9.51910814344128  |
| C | 2.13281414086290  | 3.93136318626934  | 8.18308995169320  |
| C | -0.57227712129600 | 2.24516590858223  | 11.13607477686471 |
| C | 3.12037812329041  | 5.50420558118493  | 9.91142647790154  |
| N | 4.20290067151475  | 1.89374910580448  | 6.15808156411823  |
| C | 3.98538554505873  | 0.57174907459702  | 6.07407424837511  |
| C | 4.94443526534689  | -0.38404398340921 | 6.40328469347647  |
| C | 6.22233659316807  | 0.01473175293564  | 6.85477073988636  |
| C | 6.43485894410325  | 1.40994263862042  | 6.93650620264521  |
| C | 5.41566266135321  | 2.28916811595048  | 6.58395418066373  |
| C | 7.21148407719281  | -1.00379329600031 | 7.19809126841937  |
| C | 8.47263187251242  | -0.78656164431032 | 7.66382955984464  |
| C | 9.48057867969449  | -1.78581078777616 | 8.01687801701461  |
| C | 9.27965750130391  | -3.18379351981416 | 7.91554917816966  |
| C | 10.28796647062137 | -4.08078571623229 | 8.27070977558442  |
| C | 11.52598514387624 | -3.61331641320375 | 8.73742551941043  |
| C | 11.74534249089765 | -2.23451575069604 | 8.84514609829762  |

|   |                   |                   |                   |
|---|-------------------|-------------------|-------------------|
| C | 10.73642400166129 | -1.33538958277911 | 8.48956987055121  |
| C | 5.40904036249161  | 4.33423478122966  | -0.14747527565151 |
| H | 5.36944403682314  | 5.18564567636611  | 2.48132596833982  |
| H | 3.50016685262231  | 2.41339612186078  | -0.28813874590507 |
| H | 2.34046758240602  | 6.66257997228101  | 5.48603153089556  |
| H | 0.76364106789396  | 8.51595458707023  | 4.98209608422229  |
| H | -2.21540325219043 | 5.48326151171834  | 4.05545088368229  |
| H | -0.51033611322050 | 3.78697389524253  | 4.59671474967148  |
| H | -1.36313054788536 | 9.28766338723143  | 4.29989127529268  |
| H | -3.54754293383439 | 7.18397130593567  | 3.68457651658561  |
| H | -2.68984471025194 | 10.95397183295891 | 3.84648767119154  |
| H | -4.36153967355350 | 12.69300789766198 | 3.33828962421060  |
| H | -6.70047745769726 | 12.06439465751586 | 2.69873660853371  |
| H | -7.34048280694335 | 9.64307336155749  | 2.57584847009173  |
| H | -5.66236081451999 | 7.88411338179712  | 3.08609016524312  |
| H | -0.36215216007853 | 1.54404196764861  | 8.45749763712904  |
| H | 1.27890088131794  | 4.20179666529343  | 11.46502473787725 |
| H | 2.99166982582885  | 0.26390354103122  | 5.72499797830773  |
| H | 4.69494119367727  | -1.44879745972080 | 6.30918307202957  |
| H | 7.39074050961004  | 1.82769774886142  | 7.27239496107302  |
| H | 5.57569195980553  | 3.37262756391049  | 6.64451473956811  |
| H | 6.86307834711399  | -2.03617746742528 | 7.05463721565559  |
| H | 8.80682946945914  | 0.25147808993179  | 7.80557644855566  |
| H | 8.32293977321700  | -3.58056211521714 | 7.55419246046726  |

|   |                   |                   |                   |
|---|-------------------|-------------------|-------------------|
| H | 10.10696625196498 | -5.16097844635681 | 8.18275091589204  |
| H | 12.31617866741373 | -4.32412262717493 | 9.01570703044172  |
| H | 12.71013972423496 | -1.85527957872488 | 9.20907076187996  |
| H | 10.91815674830010 | -0.25521449272676 | 8.57720400985675  |
| H | 4.80371979568714  | 4.75280547302648  | -0.97744430993528 |
| H | 6.00075830151933  | 3.50165591880709  | -0.57958218263771 |
| H | 6.11398241175611  | 5.11608966398152  | 0.18826672807184  |
| H | 0.68617470688079  | 1.59231461053518  | 1.66769460904903  |
| H | 1.89469168585656  | 0.36036774057559  | 2.08328803691854  |
| H | 1.75066977118911  | 0.92621994402676  | 0.38870755179080  |
| H | 2.95529430252426  | 6.42344821097256  | 9.31384448926304  |
| H | 4.17168340840371  | 5.20056937804759  | 9.73259889081581  |
| H | 3.01532355021056  | 5.76549207088056  | 10.97996615896456 |
| H | -1.22506532247339 | 3.03347622177129  | 11.56367671837934 |
| H | -0.00243328272221 | 1.81284309806725  | 11.98381082591593 |
| H | -1.22365579881852 | 1.45190440844132  | 10.72628122505226 |

**Optimized geometry for Co(dioxolene)<sub>2</sub>(stypy)<sub>2</sub>:  $S = 1/2$ ,  $\langle S^2 \rangle = 0.752272$**

|    |                  |                   |                  |
|----|------------------|-------------------|------------------|
| Co | 2.81082841547946 | 4.52451684555866  | 4.75513122156718 |
| O  | 2.16159578853558 | 5.89767861261566  | 3.63736604202985 |
| O  | 3.67887534632357 | 5.87198305418323  | 5.74262372556629 |
| O  | 3.46023381453193 | 3.15136838384367  | 5.87273668838814 |
| O  | 1.94261410073815 | 3.17715560883555  | 3.76773709120699 |
| N  | 1.21844153040191 | 4.70735135137155  | 5.90229895315701 |
| N  | 4.40334128419858 | 4.34166086348370  | 3.60789918501701 |
| C  | 2.59800240544661 | 7.07639434893266  | 4.05581318788440 |
| C  | 2.28010788004719 | 8.29642565730117  | 3.42463634369658 |
| C  | 2.78503763203606 | 9.50070832112417  | 3.93379658746778 |
| C  | 3.61278874509689 | 9.46233317820353  | 5.08423502581135 |
| C  | 3.95460339367728 | 8.27384248832586  | 5.74299996626409 |
| C  | 3.43472165990758 | 7.06189990478734  | 5.21547454606663 |
| C  | 2.46674854953865 | 10.81897747243856 | 3.27816830805161 |
| C  | 3.02420990655950 | 1.97258400343547  | 5.45399456568630 |
| C  | 3.34157764135063 | 0.75264404977387  | 6.08549853786083 |
| C  | 2.83578391225921 | -0.45159403231382 | 5.57692919586614 |
| C  | 2.00643689475299 | -0.41300222288091 | 4.42771710957044 |
| C  | 1.66526261562037 | 0.77547994814069  | 3.76848967451724 |
| C  | 2.18718585972284 | 1.98713860717983  | 4.29453603552399 |
| C  | 0.78311539225183 | 0.79622577741597  | 2.55227008713210 |
| C  | 1.32811330477464 | 4.75342375601068  | 7.24474357857296 |
| C  | 0.23078108457592 | 4.87139072685298  | 8.08718947623019 |

|   |                   |                  |                   |
|---|-------------------|------------------|-------------------|
| C | -1.07530589549132 | 4.94946017995756 | 7.55173913414179  |
| C | -1.15929699984013 | 4.90355948116850 | 6.14221516879785  |
| C | -0.01273941467493 | 4.78393535488015 | 5.36587516317030  |
| C | -2.29816574866280 | 5.06784682703670 | 8.33767580325783  |
| C | -2.39088083088925 | 5.10595802031589 | 9.69658089032524  |
| C | -3.60349174152118 | 5.21668691839368 | 10.50560888491778 |
| C | -3.47298720579305 | 5.22424628396943 | 11.91505483101468 |
| C | -4.59052154815150 | 5.32406006410734 | 12.74794066584134 |
| C | -5.87255124593062 | 5.42012823712172 | 12.19280860666721 |
| C | -6.02363104790351 | 5.41537552366833 | 10.79776440840485 |
| C | -4.90858534657748 | 5.31545687085209 | 9.96500206223795  |
| C | 4.29366954465600  | 4.29524704226669 | 2.26547326479637  |
| C | 5.39101743900974  | 4.17728149545610 | 1.42304388007034  |
| C | 6.69712133869531  | 4.09960210885164 | 1.95851220879769  |
| C | 6.78111468835179  | 4.14586297160890 | 3.36802508093325  |
| C | 5.63453154962761  | 4.26543951675482 | 4.14433703937635  |
| C | 7.92000451699853  | 3.98126732714428 | 1.17260116679015  |
| C | 8.01272712311196  | 3.94277450372313 | -0.18629251203946 |
| C | 9.22536676895773  | 3.83208051292966 | -0.99528365512678 |
| C | 9.09485934926752  | 3.82389106190680 | -2.40472562327391 |
| C | 10.21242061181307 | 3.72405424980822 | -3.23757306234413 |
| C | 11.49448096062698 | 3.62860153440055 | -2.68240543125614 |
| C | 11.64556549369234 | 3.63399749142944 | -1.28736400486236 |
| C | 10.53049284433926 | 3.73393560218571 | -0.45464043656202 |

|   |                   |                   |                   |
|---|-------------------|-------------------|-------------------|
| C | 4.83391355374653  | 8.25339218957799  | 6.96127286432454  |
| C | 3.16706691225742  | -1.77108483117969 | 6.22370584208883  |
| H | 1.63536404458922  | 8.28500220359884  | 2.53605404760566  |
| H | 4.00771129470634  | 10.40823903782834 | 5.48177000731562  |
| H | 3.98616484572767  | 0.76404105708800  | 6.97420516263491  |
| H | 1.60925367445911  | -1.35862609564854 | 4.03178300283571  |
| H | 2.34241236128130  | 4.69180561064314  | 7.64827096531186  |
| H | 0.41513628982063  | 4.90066716171100  | 9.16665323267037  |
| H | -2.13218636710841 | 4.95956744152923  | 5.63835628020431  |
| H | -0.06985855120203 | 4.74554899017283  | 4.27477873542918  |
| H | -3.21530714505923 | 5.12432634469020  | 7.73547184374519  |
| H | -1.46533069492851 | 5.04521189693094  | 10.28715528298570 |
| H | -2.47092388884111 | 5.14868598096880  | 12.35941417023989 |
| H | -4.45917688926517 | 5.32692048154830  | 13.83870614147254 |
| H | -6.75397242392746 | 5.49889564544124  | 12.84394017577024 |
| H | -7.02590716023431 | 5.49079903828987  | 10.35400816431532 |
| H | -5.05928444414997 | 5.31474169252503  | 8.87854208179174  |
| H | 3.27934878373040  | 4.35657954438764  | 1.86194596088410  |
| H | 5.20667078883856  | 4.14770129831417  | 0.34358677894021  |
| H | 7.75402076551936  | 4.09017186762989  | 3.87188740156601  |
| H | 5.69163516223298  | 4.30407909274560  | 5.23542872105224  |
| H | 8.83716117688189  | 3.92516178808988  | 1.77481702671130  |
| H | 7.08716204614684  | 4.00311520506938  | -0.77688521322375 |
| H | 8.09277241095474  | 3.89896459566307  | -2.84911419054171 |

|   |                   |                   |                   |
|---|-------------------|-------------------|-------------------|
| H | 10.08107287554556 | 3.72069234867141  | -4.32833675683153 |
| H | 12.37592291465187 | 3.54982032732291  | -3.33350718957917 |
| H | 12.64786648172298 | 3.55906904176886  | -0.84358019183436 |
| H | 10.68119399231798 | 3.73517369956554  | 0.63181880512881  |
| H | 1.98613514224840  | 11.52081771053141 | 3.98997196388012  |
| H | 1.78638107768542  | 10.69339384587869 | 2.41598417295185  |
| H | 3.38568457514713  | 11.32154506089419 | 2.91200845477297  |
| H | 4.31011217501478  | 7.81279410586470  | 7.83383682683353  |
| H | 5.15970134231700  | 9.27281510852740  | 7.23730849557938  |
| H | 5.74020295957821  | 7.63574432076023  | 6.79780032151392  |
| H | -0.12206434645622 | 1.41507901632724  | 2.71735974415907  |
| H | 0.45548642110412  | -0.22298528044410 | 2.27762979682821  |
| H | 1.30546232355082  | 1.23559359668815  | 1.67821632366500  |
| H | 2.25020444367041  | -2.34213980329419 | 6.47416918525533  |
| H | 3.74796075873113  | -1.63568522250756 | 7.15441972056248  |
| H | 3.76458471845411  | -2.41528716072755 | 5.54567371177289  |



**Optimized geometry for Co(dioxolene)<sub>2</sub>(stypy)<sub>1</sub>:  $S = 5/2$ ,  $\langle S^2 \rangle = 8.767894$**

|    |           |           |          |
|----|-----------|-----------|----------|
| Co | 2.158632  | 3.764094  | 5.520754 |
| O  | 3.685162  | 4.594966  | 4.502649 |
| O  | 2.094067  | 2.610426  | 3.883692 |
| C  | 3.849455  | 4.066193  | 3.327927 |
| C  | 4.848186  | 4.477188  | 2.409246 |
| C  | 4.951432  | 3.861397  | 1.163988 |
| C  | 4.050021  | 2.800102  | 0.834738 |
| C  | 3.061595  | 2.335531  | 1.697471 |
| C  | 2.946984  | 2.972397  | 2.973983 |
| C  | 2.131853  | 1.215302  | 1.333838 |
| N  | 0.765453  | 5.283934  | 5.044775 |
| C  | 1.068909  | 6.593091  | 5.116699 |
| C  | 0.159470  | 7.598349  | 4.806886 |
| C  | -1.153873 | 7.277260  | 4.394115 |
| C  | -1.453351 | 5.896836  | 4.325513 |
| C  | -0.483755 | 4.957662  | 4.652549 |
| C  | -2.086257 | 8.352470  | 4.074853 |
| C  | -3.381586 | 8.212303  | 3.675747 |
| C  | -4.334644 | 9.271709  | 3.349869 |
| C  | -4.028831 | 10.653390 | 3.400357 |
| C  | -4.989097 | 11.611976 | 3.075074 |
| C  | -6.281481 | 11.223629 | 2.690097 |
| C  | -6.604500 | 9.862238  | 2.633845 |

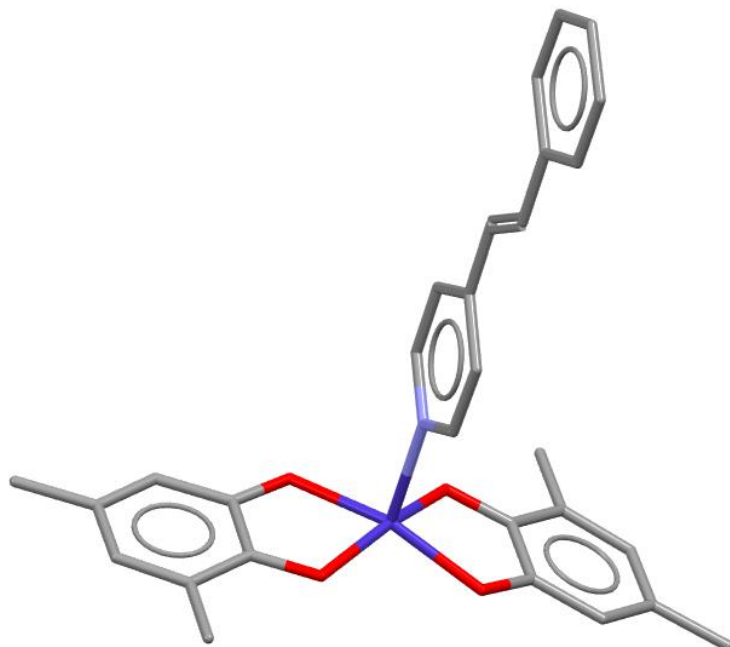

|   |           |           |           |
|---|-----------|-----------|-----------|
| C | -5.643762 | 8.901154  | 2.959032  |
| O | 1.148183  | 2.597321  | 6.773707  |
| O | 2.720370  | 4.625455  | 7.273096  |
| C | 1.253337  | 2.955275  | 8.020965  |
| C | 0.591964  | 2.304823  | 9.088817  |
| C | 0.793292  | 2.732019  | 10.401488 |
| C | 1.682284  | 3.824141  | 10.653382 |
| C | 2.368038  | 4.499899  | 9.650003  |
| C | 2.149112  | 4.076792  | 8.297185  |
| C | 0.099448  | 2.069068  | 11.556905 |
| C | 3.298847  | 5.641719  | 9.933025  |
| C | 5.983536  | 4.286075  | 0.158306  |
| H | 5.525149  | 5.292041  | 2.696087  |
| H | 4.147253  | 2.325770  | -0.152110 |
| H | 2.087481  | 6.839054  | 5.437723  |
| H | 0.477176  | 8.645474  | 4.888229  |
| H | -2.440431 | 5.535218  | 4.017058  |
| H | -0.712882 | 3.885868  | 4.599683  |
| H | -1.663037 | 9.360985  | 4.180021  |
| H | -3.792935 | 7.197242  | 3.576943  |
| H | -3.027322 | 10.988026 | 3.697326  |
| H | -4.727405 | 12.678067 | 3.121724  |
| H | -7.033627 | 11.982763 | 2.435007  |
| H | -7.612889 | 9.545533  | 2.334063  |

|   |           |          |           |
|---|-----------|----------|-----------|
| H | -5.906175 | 7.835174 | 2.911745  |
| H | -0.078047 | 1.465269 | 8.863908  |
| H | 1.829047  | 4.142919 | 11.694991 |
| H | 5.504666  | 4.648897 | -0.774329 |
| H | 6.630523  | 3.433764 | -0.133441 |
| H | 6.631003  | 5.092321 | 0.547318  |
| H | 1.073861  | 1.545305 | 1.357791  |
| H | 2.213551  | 0.376459 | 2.053882  |
| H | 2.349310  | 0.826482 | 0.322834  |
| H | 2.961436  | 6.570309 | 9.430294  |
| H | 4.317744  | 5.432656 | 9.549822  |
| H | 3.370134  | 5.841781 | 11.017202 |
| H | -0.526864 | 2.795284 | 12.114531 |
| H | 0.833754  | 1.666556 | 12.284345 |
| H | -0.549209 | 1.238049 | 11.226625 |

**Optimized geometry for Co(dioxolene)<sub>2</sub>(stypy)<sub>1</sub>:  $S = 3/2$ ,  $\langle S^2 \rangle = 3.771699$**

|    |          |           |          |
|----|----------|-----------|----------|
| Co | 3.055824 | 4.473199  | 4.580454 |
| O  | 2.187385 | 5.813917  | 3.660557 |
| O  | 3.732074 | 5.793513  | 5.678140 |
| O  | 3.489499 | 3.184053  | 5.824681 |
| O  | 2.005852 | 3.195015  | 3.761631 |
| N  | 4.814536 | 4.272559  | 3.301064 |
| C  | 2.486571 | 7.020720  | 4.152810 |
| C  | 2.002200 | 8.228526  | 3.628455 |
| C  | 2.383794 | 9.439253  | 4.233520 |
| C  | 3.243852 | 9.402491  | 5.356784 |
| C  | 3.744259 | 8.212180  | 5.909490 |
| C  | 3.348761 | 7.007640  | 5.280233 |
| C  | 1.887109 | 10.759077 | 3.707374 |
| C  | 2.923248 | 2.008720  | 5.532974 |
| C  | 3.102738 | 0.838031  | 6.285792 |
| C  | 2.450306 | -0.340652 | 5.883682 |
| C  | 1.628466 | -0.309596 | 4.731871 |
| C  | 1.424261 | 0.844380  | 3.957387 |
| C  | 2.095213 | 2.016328  | 4.380208 |
| C  | 0.542816 | 0.856034  | 2.742537 |
| C  | 4.708952 | 4.271296  | 1.958143 |
| C  | 5.803046 | 4.164329  | 1.107911 |
| C  | 7.107321 | 4.049336  | 1.642284 |

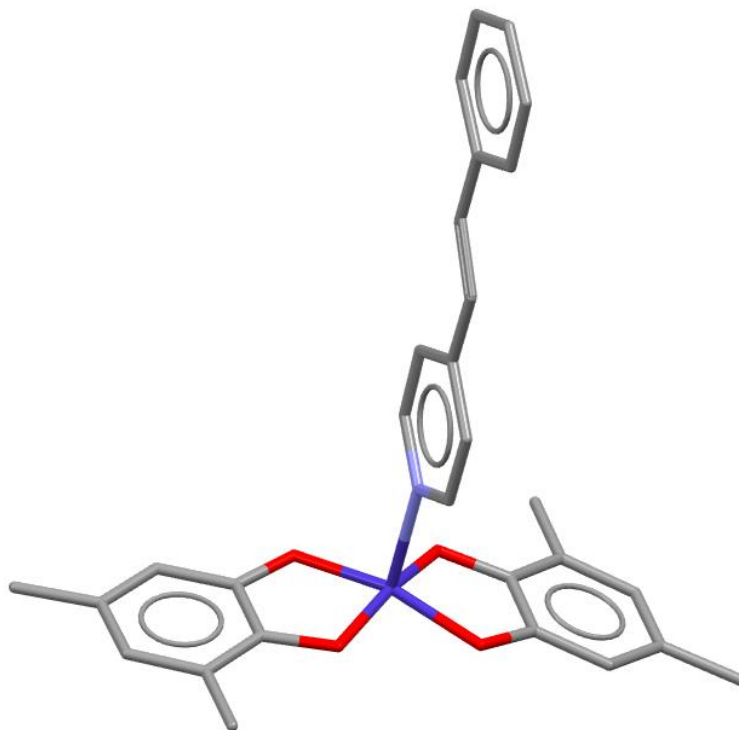

|   |           |           |           |
|---|-----------|-----------|-----------|
| C | 7.193653  | 4.049062  | 3.052954  |
| C | 6.045501  | 4.161119  | 3.830238  |
| C | 8.329103  | 3.937247  | 0.852948  |
| C | 8.422068  | 3.935068  | -0.506370 |
| C | 9.633889  | 3.831136  | -1.317513 |
| C | 9.504144  | 3.864574  | -2.726630 |
| C | 10.620978 | 3.773959  | -3.561512 |
| C | 11.901213 | 3.646304  | -3.008666 |
| C | 12.051393 | 3.609956  | -1.613972 |
| C | 10.937101 | 3.700619  | -0.779164 |
| C | 4.652418  | 8.196277  | 7.104314  |
| C | 2.615858  | -1.620911 | 6.657745  |
| H | 1.334382  | 8.213877  | 2.757935  |
| H | 3.536854  | 10.352506 | 5.825243  |
| H | 3.745072  | 0.857326  | 7.175227  |
| H | 1.119615  | -1.234111 | 4.424904  |
| H | 3.695171  | 4.361785  | 1.550188  |
| H | 5.621221  | 4.172952  | 0.027486  |
| H | 8.167052  | 3.962379  | 3.551843  |
| H | 6.109427  | 4.163359  | 4.924747  |
| H | 9.245147  | 3.852252  | 1.453465  |
| H | 7.497949  | 4.023250  | -1.095738 |
| H | 8.503444  | 3.965133  | -3.169082 |
| H | 10.490479 | 3.803168  | -4.651977 |

|   |           |           |           |
|---|-----------|-----------|-----------|
| H | 12.782075 | 3.574692  | -3.661374 |
| H | 13.052297 | 3.509404  | -1.172125 |
| H | 11.087149 | 3.668797  | 0.306925  |
| H | 1.298785  | 11.301299 | 4.475373  |
| H | 1.245038  | 10.629655 | 2.817414  |
| H | 2.729650  | 11.423002 | 3.426797  |
| H | 4.207534  | 7.621118  | 7.941000  |
| H | 4.860043  | 9.220465  | 7.462572  |
| H | 5.619955  | 7.709479  | 6.868733  |
| H | -0.280691 | 1.590166  | 2.849782  |
| H | 0.096606  | -0.138380 | 2.562415  |
| H | 1.109080  | 1.149963  | 1.836083  |
| H | 1.637621  | -2.010475 | 7.004860  |
| H | 3.261193  | -1.482044 | 7.543823  |
| H | 3.068094  | -2.414634 | 6.028819  |

**Optimized geometry for Co(dioxolene)<sub>2</sub>(stypy)<sub>1</sub>:  $S = 1/2$ ,  $\langle S^2 \rangle = 0.766696$**

|    |          |           |          |
|----|----------|-----------|----------|
| Co | 3.030665 | 4.489007  | 4.597385 |
| O  | 2.175674 | 5.853192  | 3.664016 |
| O  | 3.667851 | 5.827308  | 5.718572 |
| O  | 3.473691 | 3.168700  | 5.832513 |
| O  | 1.981268 | 3.193998  | 3.778104 |
| N  | 4.560692 | 4.334314  | 3.496494 |
| C  | 2.546714 | 7.044984  | 4.095704 |
| C  | 2.160705 | 8.265409  | 3.503316 |
| C  | 2.605291 | 9.466379  | 4.064077 |
| C  | 3.445664 | 9.426797  | 5.213216 |
| C  | 3.859987 | 8.242012  | 5.826573 |
| C  | 3.389195 | 7.029619  | 5.251516 |
| C  | 2.215464 | 10.794874 | 3.474666 |
| C  | 3.008798 | 1.987064  | 5.469733 |
| C  | 3.282068 | 0.779038  | 6.144521 |
| C  | 2.711821 | -0.408039 | 5.675486 |
| C  | 1.878359 | -0.369349 | 4.521277 |
| C  | 1.589470 | 0.801580  | 3.816313 |
| C  | 2.168180 | 2.001996  | 4.312599 |
| C  | 0.705402 | 0.823568  | 2.603324 |
| C  | 4.447599 | 4.301790  | 2.148667 |
| C  | 5.546524 | 4.189404  | 1.310471 |
| C  | 6.853586 | 4.103278  | 1.844799 |

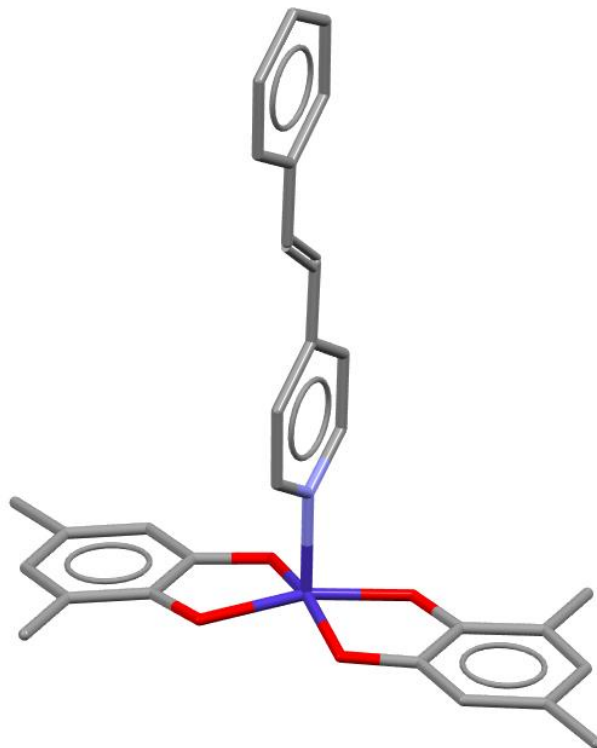

|   |           |           |           |
|---|-----------|-----------|-----------|
| C | 6.937566  | 4.139752  | 3.255573  |
| C | 5.795787  | 4.253205  | 4.036695  |
| C | 8.073859  | 3.984607  | 1.058820  |
| C | 8.163503  | 3.939799  | -0.300983 |
| C | 9.373865  | 3.824074  | -1.111176 |
| C | 9.239345  | 3.802107  | -2.520314 |
| C | 10.354836 | 3.695107  | -3.354763 |
| C | 11.638279 | 3.606455  | -2.801570 |
| C | 11.793282 | 3.626029  | -1.407020 |
| C | 10.680474 | 3.732962  | -0.572414 |
| C | 4.745558  | 8.220181  | 7.038485  |
| C | 2.964735  | -1.721124 | 6.365543  |
| H | 1.513457  | 8.254908  | 2.617256  |
| H | 3.790613  | 10.379505 | 5.639353  |
| H | 3.930152  | 0.789559  | 7.029980  |
| H | 1.440287  | -1.311763 | 4.163270  |
| H | 3.434752  | 4.369410  | 1.742994  |
| H | 5.360445  | 4.170649  | 0.231151  |
| H | 7.909826  | 4.079060  | 3.759900  |
| H | 5.856214  | 4.281731  | 5.127733  |
| H | 8.991847  | 3.930079  | 1.659617  |
| H | 7.236769  | 3.995973  | -0.890075 |
| H | 8.235991  | 3.871542  | -2.962673 |
| H | 10.220949 | 3.680661  | -4.445089 |



|   |           |           |           |
|---|-----------|-----------|-----------|
| H | 12.518144 | 3.522020  | -3.454073 |
| H | 12.796884 | 3.556718  | -0.965367 |
| H | 10.833971 | 3.745387  | 0.513544  |
| H | 1.659495  | 11.411929 | 4.209733  |
| H | 1.578150  | 10.675033 | 2.579939  |
| H | 3.109572  | 11.382178 | 3.182080  |
| H | 4.235315  | 7.750341  | 7.903436  |
| H | 5.046858  | 9.241855  | 7.331942  |
| H | 5.663499  | 7.626526  | 6.855698  |
| H | -0.186047 | 1.462363  | 2.765327  |
| H | 0.357019  | -0.192372 | 2.344102  |
| H | 1.235944  | 1.242683  | 1.724935  |
| H | 2.017613  | -2.177189 | 6.719085  |
| H | 3.632470  | -1.603118 | 7.238014  |
| H | 3.429693  | -2.454602 | 5.675660  |

**Optimized geometry for Co(dioxolene)<sub>2</sub>(stypy)<sub>1</sub>(CN)<sub>1</sub><sup>-</sup>:  $S = 5/2$ ,  $\langle S^2 \rangle = 8.769712$**

|    |           |          |           |
|----|-----------|----------|-----------|
| Co | 2.432723  | 3.653799 | 5.602976  |
| O  | 3.868519  | 4.556521 | 4.429413  |
| O  | 2.172349  | 2.621138 | 3.844425  |
| C  | 3.915356  | 4.075465 | 3.228534  |
| C  | 4.834790  | 4.517357 | 2.238864  |
| C  | 4.815629  | 3.972735 | 0.956416  |
| C  | 3.862125  | 2.954388 | 0.650292  |
| C  | 2.941936  | 2.466162 | 1.574443  |
| C  | 2.958119  | 3.019503 | 2.897577  |
| C  | 1.949980  | 1.392621 | 1.231699  |
| C  | 1.041212  | 5.121173 | 5.126656  |
| O  | 1.173891  | 2.624630 | 6.849268  |
| O  | 2.863011  | 4.573406 | 7.406653  |
| C  | 1.224593  | 3.025773 | 8.079785  |
| C  | 0.427100  | 2.477079 | 9.119537  |
| C  | 0.553817  | 2.935157 | 10.429644 |
| C  | 1.500965  | 3.965333 | 10.715049 |
| C  | 2.311496  | 4.548270 | 9.744519  |
| C  | 2.178274  | 4.090874 | 8.390885  |
| C  | -0.282141 | 2.370212 | 11.545339 |
| C  | 3.298664  | 5.632577 | 10.066143 |
| N  | 4.043490  | 2.039831 | 6.146014  |
| C  | 3.782534  | 0.726062 | 6.046245  |

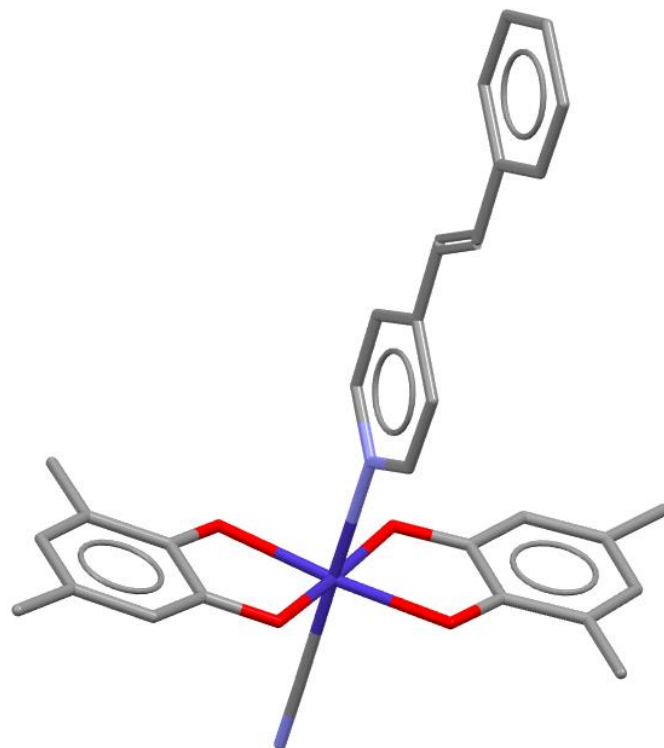

|   |           |           |           |
|---|-----------|-----------|-----------|
| C | 4.710347  | -0.267097 | 6.353384  |
| C | 6.005352  | 0.079943  | 6.798070  |
| C | 6.266403  | 1.465120  | 6.898847  |
| C | 5.274546  | 2.383647  | 6.568146  |
| C | 6.961795  | -0.977798 | 7.115628  |
| C | 8.239908  | -0.814146 | 7.556011  |
| C | 9.213641  | -1.856484 | 7.880727  |
| C | 8.955220  | -3.244053 | 7.767777  |
| C | 9.932150  | -4.185184 | 8.095594  |
| C | 11.195820 | -3.773677 | 8.545950  |
| C | 11.472211 | -2.406080 | 8.664574  |
| C | 10.494673 | -1.462834 | 8.336278  |
| C | 5.769196  | 4.436396  | -0.110766 |
| N | 0.257947  | 5.953160  | 4.841382  |
| H | 5.552469  | 5.304356  | 2.506228  |
| H | 3.856296  | 2.535877  | -0.366602 |
| H | -0.289450 | 1.684347  | 8.866508  |
| H | 1.590803  | 4.316397  | 11.753292 |
| H | 2.776717  | 0.457143  | 5.701422  |
| H | 4.423119  | -1.321082 | 6.245870  |
| H | 7.238619  | 1.844615  | 7.233446  |
| H | 5.474261  | 3.459629  | 6.644305  |
| H | 6.570735  | -1.994914 | 6.972293  |
| H | 8.618355  | 0.208748  | 7.696821  |

|   |           |           |           |
|---|-----------|-----------|-----------|
| H | 7.977412  | -3.597506 | 7.418087  |
| H | 9.705931  | -5.256101 | 7.998754  |
| H | 11.961304 | -4.518825 | 8.802715  |
| H | 12.457600 | -2.069967 | 9.015672  |
| H | 10.721549 | -0.391968 | 8.432797  |
| H | 5.224486  | 4.864765  | -0.977351 |
| H | 6.372377  | 3.593153  | -0.505435 |
| H | 6.466033  | 5.206696  | 0.266915  |
| H | 0.909110  | 1.738371  | 1.393679  |
| H | 2.083085  | 0.499575  | 1.875505  |
| H | 2.048406  | 1.075249  | 0.177574  |
| H | 3.082695  | 6.557157  | 9.493598  |
| H | 4.330618  | 5.333275  | 9.792037  |
| H | 3.286318  | 5.882056  | 11.142796 |
| H | -0.896549 | 3.159044  | 12.026314 |
| H | 0.353251  | 1.936852  | 12.344959 |
| H | -0.965461 | 1.578925  | 11.186835 |

**Optimized geometry for Co(dioxolene)<sub>2</sub>(stypy)<sub>1</sub>(CN)<sub>1</sub><sup>-</sup>:  $S = 3/2$ ,  $\langle S^2 \rangle = 3.786357$**

|    |           |           |          |
|----|-----------|-----------|----------|
| Co | 2.508788  | 4.553837  | 4.956625 |
| O  | 1.849888  | 6.107374  | 3.827432 |
| O  | 3.405189  | 6.073777  | 5.959780 |
| O  | 3.186132  | 3.004031  | 6.076926 |
| O  | 1.625621  | 3.026189  | 3.949115 |
| N  | 0.869169  | 4.719478  | 6.149744 |
| C  | 3.993915  | 4.407457  | 3.865685 |
| C  | 2.533272  | 7.185351  | 4.078186 |
| C  | 2.452451  | 8.366406  | 3.296245 |
| C  | 3.184103  | 9.504349  | 3.641341 |
| C  | 4.019144  | 9.462196  | 4.793938 |
| C  | 4.144386  | 8.332590  | 5.603314 |
| C  | 3.393184  | 7.165395  | 5.255582 |
| C  | 3.107463  | 10.764673 | 2.821213 |
| C  | 2.996784  | 1.869315  | 5.471003 |
| C  | 3.547093  | 0.640151  | 5.917749 |
| C  | 3.271486  | -0.552141 | 5.246357 |
| C  | 2.428349  | -0.516499 | 4.099203 |
| C  | 1.858280  | 0.658044  | 3.607259 |
| C  | 2.134790  | 1.882717  | 4.294641 |
| C  | 0.973889  | 0.671367  | 2.393058 |
| C  | 0.976700  | 4.741648  | 7.492722 |
| C  | -0.114741 | 4.861096  | 8.344209 |

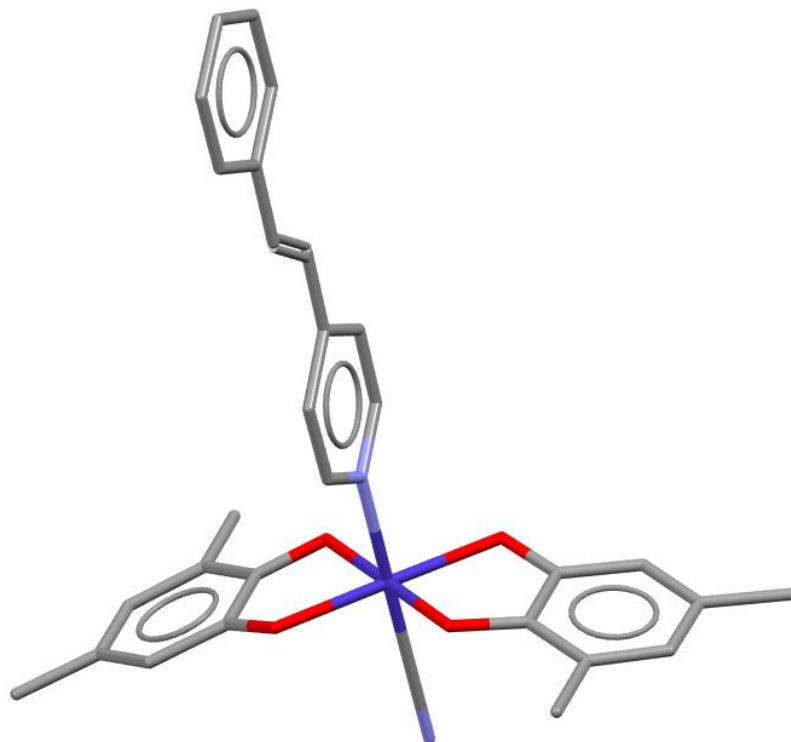

|   |           |           |           |
|---|-----------|-----------|-----------|
| C | -1.420773 | 4.966868  | 7.813532  |
| C | -1.510705 | 4.939906  | 6.403879  |
| C | -0.365068 | 4.817868  | 5.624572  |
| C | -2.639447 | 5.098068  | 8.605861  |
| C | -2.728185 | 5.138676  | 9.964684  |
| C | -3.937512 | 5.269125  | 10.776858 |
| C | -3.804376 | 5.275829  | 12.186069 |
| C | -4.918051 | 5.395524  | 13.021762 |
| C | -6.199879 | 5.512990  | 12.470291 |
| C | -6.353723 | 5.509429  | 11.075588 |
| C | -5.242389 | 5.389668  | 10.240148 |
| C | 5.034824  | 8.307717  | 6.812922  |
| C | 3.844634  | -1.865037 | 5.709281  |
| N | 4.937917  | 4.314953  | 3.167001  |
| H | 1.800762  | 8.364830  | 2.412112  |
| H | 4.594567  | 10.361611 | 5.057609  |
| H | 4.194617  | 0.648841  | 6.804782  |
| H | 2.217418  | -1.459766 | 3.574482  |
| H | 1.991453  | 4.658936  | 7.895660  |
| H | 0.071474  | 4.870436  | 9.423908  |
| H | -2.485572 | 5.015768  | 5.905937  |
| H | -0.429388 | 4.798079  | 4.531734  |
| H | -3.558022 | 5.167699  | 8.006823  |
| H | -1.802066 | 5.066361  | 10.553072 |

|   |           |           |           |
|---|-----------|-----------|-----------|
| H | -2.802690 | 5.183877  | 12.628287 |
| H | -4.783449 | 5.397318  | 14.112216 |
| H | -7.078229 | 5.607678  | 13.123492 |
| H | -7.355478 | 5.601811  | 10.633663 |
| H | -5.395953 | 5.391228  | 9.154069  |
| H | 2.743426  | 11.620508 | 3.426454  |
| H | 2.428634  | 10.648953 | 1.956494  |
| H | 4.105234  | 11.056144 | 2.433229  |
| H | 4.457465  | 8.102921  | 7.737529  |
| H | 5.562835  | 9.270014  | 6.944404  |
| H | 5.794935  | 7.503776  | 6.738945  |
| H | -0.034230 | 1.068073  | 2.630278  |
| H | 0.853460  | -0.343456 | 1.971533  |
| H | 1.385490  | 1.327865  | 1.599690  |
| H | 3.043505  | -2.587986 | 5.968021  |
| H | 4.487530  | -1.740232 | 6.599903  |
| H | 4.453958  | -2.342858 | 4.914677  |

**Optimized geometry for Co(dioxolene)<sub>2</sub>(stypy)<sub>1</sub>(CN)<sub>1</sub><sup>-</sup>:  $S = 1/2$ ,  $\langle S^2 \rangle = 0.752475$**

|    |          |           |          |
|----|----------|-----------|----------|
| Co | 2.875810 | 4.529220  | 4.707278 |
| O  | 2.207399 | 5.902166  | 3.596728 |
| O  | 3.730931 | 5.881114  | 5.702437 |
| O  | 3.496197 | 3.162363  | 5.851218 |
| O  | 1.969000 | 3.185434  | 3.749199 |
| N  | 1.150528 | 4.745293  | 5.955542 |
| C  | 4.352744 | 4.342151  | 3.634730 |
| C  | 2.660859 | 7.077937  | 4.002268 |
| C  | 2.360917 | 8.295628  | 3.355708 |
| C  | 2.875987 | 9.500062  | 3.854262 |
| C  | 3.705243 | 9.464430  | 5.003570 |
| C  | 4.038091 | 8.277830  | 5.670905 |
| C  | 3.499067 | 7.066079  | 5.160879 |
| C  | 2.565799 | 10.816066 | 3.188867 |
| C  | 3.059120 | 1.984561  | 5.433249 |
| C  | 3.383118 | 0.763470  | 6.061379 |
| C  | 2.872269 | -0.441139 | 5.558680 |
| C  | 2.039258 | -0.404148 | 4.412201 |
| C  | 1.699640 | 0.783856  | 3.750708 |
| C  | 2.217634 | 1.997611  | 4.277180 |
| C  | 0.818235 | 0.803570  | 2.533822 |
| C  | 1.254934 | 4.782275  | 7.295439 |
| C  | 0.160280 | 4.894386  | 8.145958 |

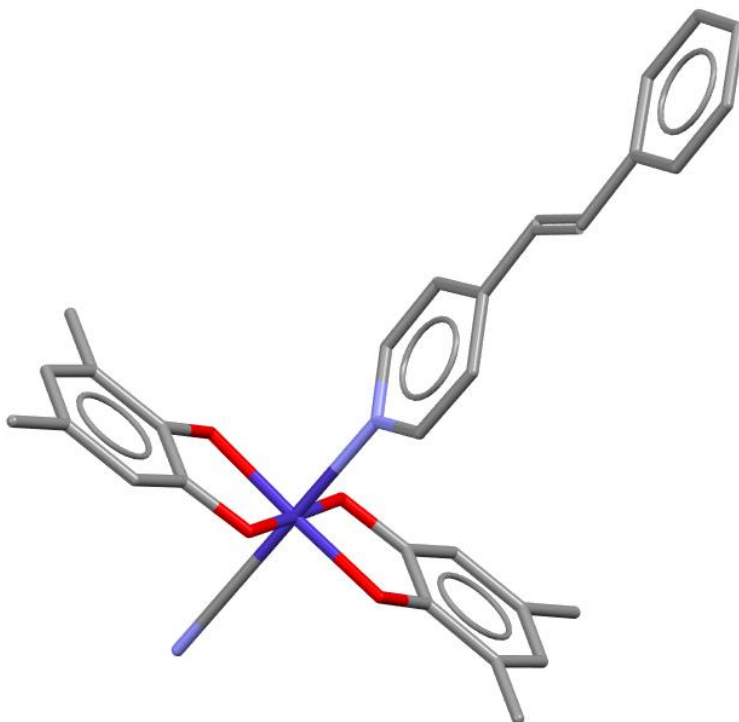



|   |           |           |           |
|---|-----------|-----------|-----------|
| C | -1.145066 | 4.976031  | 7.609971  |
| C | -1.231651 | 4.943668  | 6.200439  |
| C | -0.079945 | 4.828414  | 5.426722  |
| C | -2.369436 | 5.083574  | 8.399002  |
| C | -2.465189 | 5.093687  | 9.757481  |
| C | -3.680436 | 5.188130  | 10.566332 |
| C | -3.555300 | 5.152656  | 11.975732 |
| C | -4.675194 | 5.232221  | 12.808001 |
| C | -5.955202 | 5.351194  | 12.252725 |
| C | -6.101014 | 5.390237  | 10.857714 |
| C | -4.983436 | 5.310340  | 10.025761 |
| C | 4.923794  | 8.258719  | 6.884655  |
| C | 3.202253  | -1.760016 | 6.208735  |
| N | 5.299689  | 4.221680  | 2.946685  |
| H | 1.717091  | 8.282086  | 2.466223  |
| H | 4.110617  | 10.410206 | 5.391429  |
| H | 4.033753  | 0.775443  | 6.945921  |
| H | 1.640352  | -1.350403 | 4.018850  |
| H | 2.271878  | 4.715700  | 7.698116  |
| H | 0.341239  | 4.915766  | 9.226550  |
| H | -2.206823 | 5.005069  | 5.700771  |
| H | -0.136596 | 4.797986  | 4.332884  |
| H | -3.286105 | 5.152934  | 7.796953  |
| H | -1.541212 | 5.017340  | 10.348743 |

|   |           |           |           |
|---|-----------|-----------|-----------|
| H | -2.555126 | 5.058658  | 12.420925 |
| H | -4.546887 | 5.201055  | 13.898773 |
| H | -6.838383 | 5.414089  | 12.903247 |
| H | -7.101264 | 5.484521  | 10.412788 |
| H | -5.130666 | 5.344466  | 8.939309  |
| H | 2.059700  | 11.515565 | 3.885735  |
| H | 1.909362  | 10.684130 | 2.309077  |
| H | 3.489835  | 11.325993 | 2.846581  |
| H | 4.395443  | 7.847148  | 7.768816  |
| H | 5.276697  | 9.274687  | 7.140151  |
| H | 5.812768  | 7.614875  | 6.727015  |
| H | -0.096986 | 1.406587  | 2.703539  |
| H | 0.506560  | -0.217563 | 2.247196  |
| H | 1.335139  | 1.261706  | 1.666167  |
| H | 2.284931  | -2.316679 | 6.489546  |
| H | 3.808792  | -1.624107 | 7.123049  |
| H | 3.773255  | -2.419192 | 5.522262  |

**Optimized geometry for  $\text{Co}(\text{dioxolene})_2(\text{CN})_1^-$ :  $S = 5/2$ ,  $\langle S^2 \rangle = 8.766626$**

|    |           |          |           |
|----|-----------|----------|-----------|
| Co | 1.912187  | 3.940647 | 5.436974  |
| O  | 3.542481  | 4.677310 | 4.469677  |
| O  | 1.896462  | 2.739306 | 3.813670  |
| C  | 3.720360  | 4.130241 | 3.306903  |
| C  | 4.766872  | 4.490987 | 2.418321  |
| C  | 4.889664  | 3.861745 | 1.181491  |
| C  | 3.962404  | 2.831343 | 0.831629  |
| C  | 2.929229  | 2.412342 | 1.666087  |
| C  | 2.790460  | 3.066432 | 2.932021  |
| C  | 1.971604  | 1.322955 | 1.280358  |
| C  | 0.644918  | 5.445848 | 4.975079  |
| O  | 0.967926  | 2.726619 | 6.715213  |
| O  | 2.553603  | 4.750010 | 7.215432  |
| C  | 1.113434  | 3.056711 | 7.965147  |
| C  | 0.493286  | 2.375738 | 9.039596  |
| C  | 0.737029  | 2.768534 | 10.356590 |
| C  | 1.630531  | 3.855439 | 10.607178 |
| C  | 2.280265  | 4.557972 | 9.597421  |
| C  | 2.015507  | 4.173474 | 8.240057  |
| C  | 0.080414  | 2.073311 | 11.515947 |
| C  | 3.216596  | 5.696029 | 9.878524  |
| C  | 5.967058  | 4.244889 | 0.205717  |
| N  | -0.106750 | 6.303707 | 4.684162  |

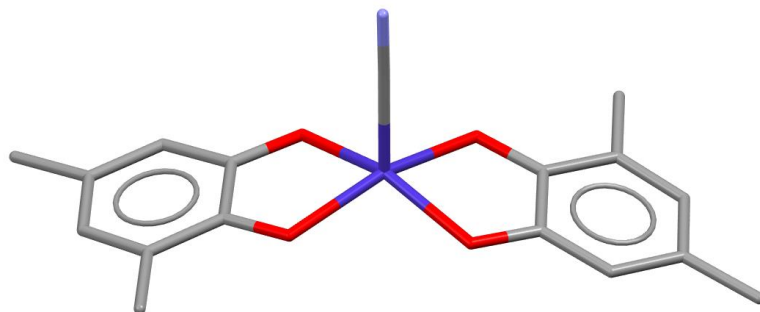

|   |           |          |           |
|---|-----------|----------|-----------|
| H | 5.462265  | 5.284668 | 2.720835  |
| H | 4.073165  | 2.343906 | -0.147631 |
| H | -0.182297 | 1.540048 | 8.815906  |
| H | 1.811223  | 4.149512 | 11.650915 |
| H | 5.531365  | 4.642182 | -0.734297 |
| H | 6.580376  | 3.366125 | -0.080245 |
| H | 6.642394  | 5.015210 | 0.619940  |
| H | 0.926210  | 1.691653 | 1.264044  |
| H | 1.995897  | 0.489317 | 2.010851  |
| H | 2.209189  | 0.915032 | 0.281229  |
| H | 2.857535  | 6.637083 | 9.415379  |
| H | 4.221365  | 5.503852 | 9.451271  |
| H | 3.327901  | 5.865732 | 10.964731 |
| H | -0.540042 | 2.779613 | 12.105108 |
| H | 0.836400  | 1.662262 | 12.215989 |
| H | -0.568353 | 1.242701 | 11.184249 |

**Optimized geometry for  $\text{Co}(\text{dioxolene})_2(\text{CN})_1^-$ :  $S = 3/2$ ,  $\langle S^2 \rangle = 3.771273$**

|    |          |           |          |
|----|----------|-----------|----------|
| Co | 4.031684 | 4.339805  | 3.841209 |
| O  | 2.408309 | 5.583849  | 3.611092 |
| O  | 4.758624 | 5.800061  | 4.772524 |
| O  | 3.481101 | 3.497515  | 5.486825 |
| O  | 3.352046 | 2.808405  | 3.019603 |
| C  | 4.892015 | 4.832763  | 2.251022 |
| C  | 2.677031 | 6.719975  | 4.176107 |
| C  | 1.780408 | 7.821964  | 4.209805 |
| C  | 2.151402 | 9.016328  | 4.823494 |
| C  | 3.444217 | 9.117896  | 5.419614 |
| C  | 4.369010 | 8.075152  | 5.424804 |
| C  | 3.981116 | 6.851225  | 4.801526 |
| C  | 1.221882 | 10.198604 | 4.868303 |
| C  | 2.940126 | 2.322464  | 5.259154 |
| C  | 2.446068 | 1.457942  | 6.261036 |
| C  | 1.912676 | 0.215212  | 5.902141 |
| C  | 1.878079 | -0.157826 | 4.528871 |
| C  | 2.353128 | 0.661267  | 3.501504 |
| C  | 2.884162 | 1.925795  | 3.881986 |
| C  | 2.308963 | 0.257260  | 2.056389 |
| C  | 5.724892 | 8.201068  | 6.057274 |
| C  | 1.379353 | -0.733033 | 6.942244 |
| N  | 5.463973 | 5.115824  | 1.261493 |

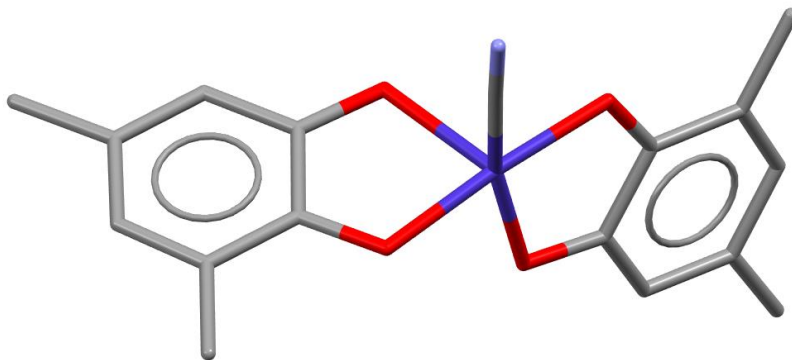

|   |          |           |          |
|---|----------|-----------|----------|
| H | 0.795339 | 7.709759  | 3.738529 |
| H | 3.725057 | 10.066485 | 5.898968 |
| H | 2.490376 | 1.773546  | 7.311427 |
| H | 1.455909 | -1.137169 | 4.262386 |
| H | 1.003755 | 10.497971 | 5.913944 |
| H | 0.260592 | 9.983053  | 4.367605 |
| H | 1.674007 | 11.083464 | 4.375344 |
| H | 5.859612 | 7.464553  | 6.874984 |
| H | 5.878108 | 9.211972  | 6.476478 |
| H | 6.532040 | 8.004194  | 5.323488 |
| H | 1.695775 | 0.961345  | 1.458574 |
| H | 1.884387 | -0.755953 | 1.936936 |
| H | 3.320974 | 0.264284  | 1.604077 |
| H | 0.315439 | -0.982013 | 6.751724 |
| H | 1.453118 | -0.308977 | 7.960127 |
| H | 1.933846 | -1.693865 | 6.932357 |

**Optimized geometry for Co(dioxolene)<sub>2</sub>(CN)<sub>1</sub><sup>-</sup>:  $S = 1/2$ ,  $\langle S^2 \rangle = 0.754246$**

|    |          |           |          |
|----|----------|-----------|----------|
| Co | 3.096309 | 4.492087  | 4.543717 |
| O  | 2.259590 | 5.852951  | 3.595102 |
| O  | 3.758497 | 5.822938  | 5.654759 |
| O  | 3.566429 | 3.168632  | 5.761328 |
| O  | 2.074689 | 3.196113  | 3.696312 |
| C  | 4.552333 | 4.348283  | 3.482800 |
| C  | 2.614514 | 7.045364  | 4.047828 |
| C  | 2.208963 | 8.267384  | 3.472792 |
| C  | 2.631592 | 9.470323  | 4.049430 |
| C  | 3.468435 | 9.429174  | 5.197927 |
| C  | 3.901031 | 8.239813  | 5.793720 |
| C  | 3.454092 | 7.028173  | 5.201366 |
| C  | 2.217437 | 10.799017 | 3.474245 |
| C  | 3.087636 | 1.988560  | 5.399736 |
| C  | 3.343975 | 0.782159  | 6.083491 |
| C  | 2.766661 | -0.405074 | 5.619452 |
| C  | 1.943834 | -0.366480 | 4.460762 |
| C  | 1.671370 | 0.805979  | 3.748330 |
| C  | 2.254135 | 2.004147  | 4.241742 |
| C  | 0.801341 | 0.828367  | 2.524590 |
| C  | 4.787301 | 8.215316  | 7.005695 |
| C  | 3.005085 | -1.715109 | 6.322864 |
| N  | 5.500484 | 4.253823  | 2.790275 |

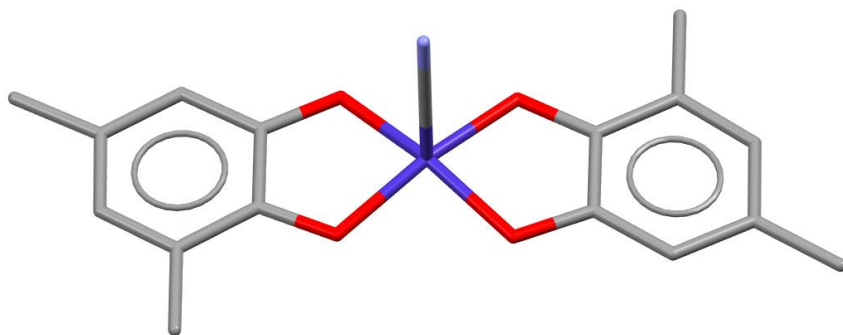

|   |           |           |          |
|---|-----------|-----------|----------|
| H | 1.564668  | 8.257641  | 2.584254 |
| H | 3.797658  | 10.380467 | 5.639907 |
| H | 3.988002  | 0.792430  | 6.972236 |
| H | 1.500481  | -1.306456 | 4.102179 |
| H | 1.633912  | 11.392175 | 4.208007 |
| H | 1.596098  | 10.676516 | 2.568372 |
| H | 3.099558  | 11.413430 | 3.201468 |
| H | 4.288749  | 7.717931  | 7.862213 |
| H | 5.066663  | 9.237732  | 7.318543 |
| H | 5.718192  | 7.645256  | 6.812540 |
| H | -0.087741 | 1.474354  | 2.671416 |
| H | 0.448921  | -0.186330 | 2.264907 |
| H | 1.345406  | 1.240098  | 1.650795 |
| H | 2.053701  | -2.161094 | 6.678439 |
| H | 3.669938  | -1.594133 | 7.197460 |
| H | 3.468659  | -2.459795 | 5.643970 |



**Optimized geometry for Co(dioxolene)(CN)<sub>4</sub><sup>2-</sup>:  $S = 5/2$ ,  $\langle S^2 \rangle = 8.767080$**

|    |           |          |          |
|----|-----------|----------|----------|
| Co | 8.025735  | 4.621374 | 6.971769 |
| C  | 7.349668  | 6.007552 | 8.372243 |
| N  | 6.902926  | 6.787263 | 9.132407 |
| C  | 6.350097  | 4.206979 | 5.832859 |
| N  | 5.359694  | 4.010189 | 5.228007 |
| C  | 8.561318  | 6.234549 | 5.702503 |
| N  | 8.841398  | 7.138519 | 5.001808 |
| C  | 7.527318  | 3.072599 | 8.337450 |
| N  | 7.208235  | 2.215039 | 9.078614 |
| O  | 9.149746  | 3.298988 | 5.845424 |
| C  | 10.384211 | 3.159547 | 6.198170 |
| C  | 11.297011 | 2.287378 | 5.556219 |
| C  | 12.618868 | 2.195302 | 6.000963 |
| C  | 13.037490 | 2.991336 | 7.107945 |
| C  | 12.192613 | 3.868278 | 7.784243 |
| C  | 10.831405 | 3.967502 | 7.334352 |
| O  | 9.956734  | 4.735388 | 7.873572 |
| C  | 13.604489 | 1.276961 | 5.336224 |
| C  | 12.650016 | 4.697014 | 8.946228 |
| H  | 10.942970 | 1.689006 | 4.707401 |
| H  | 14.080532 | 2.906413 | 7.443962 |
| H  | 13.144912 | 0.712304 | 4.505383 |
| H  | 14.020874 | 0.548040 | 6.061127 |

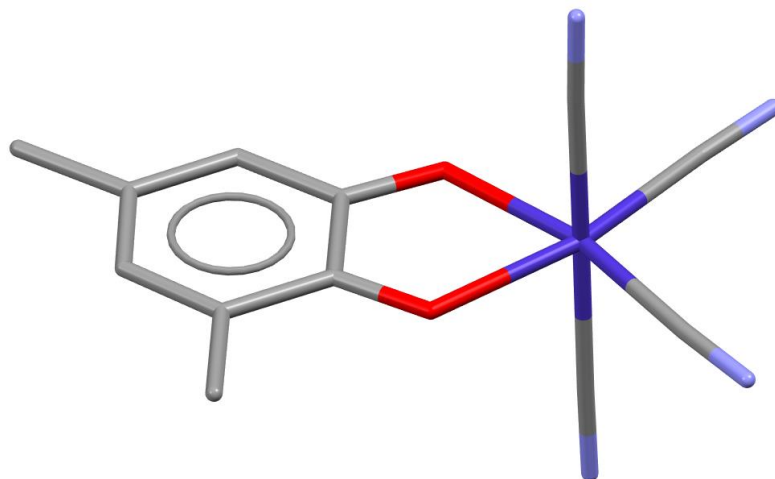

|   |           |          |          |
|---|-----------|----------|----------|
| H | 14.466790 | 1.845606 | 4.931837 |
| H | 12.524918 | 5.778701 | 8.738411 |
| H | 13.712540 | 4.507730 | 9.182282 |
| H | 12.046297 | 4.483633 | 9.850987 |

**Optimized geometry for Co(dioxolene)(CN)<sub>4</sub><sup>2-</sup>:  $S = 3/2$ ,  $\langle S^2 \rangle = 3.777312$**

|    |           |          |          |
|----|-----------|----------|----------|
| Co | 7.971453  | 4.662740 | 7.019503 |
| C  | 7.475822  | 5.973633 | 8.379057 |
| N  | 7.085888  | 6.762607 | 9.160382 |
| C  | 6.482156  | 4.193387 | 5.848807 |
| N  | 5.528768  | 3.964508 | 5.197990 |
| C  | 8.400216  | 6.086562 | 5.852798 |
| N  | 8.682844  | 6.970610 | 5.129222 |
| C  | 7.425114  | 3.288249 | 8.194651 |
| N  | 7.090411  | 2.426837 | 8.923321 |
| O  | 9.146493  | 3.264701 | 5.852037 |
| C  | 10.372448 | 3.137222 | 6.200030 |
| C  | 11.301317 | 2.270084 | 5.556554 |
| C  | 12.618603 | 2.193722 | 5.995154 |
| C  | 13.034827 | 2.998574 | 7.103881 |
| C  | 12.186538 | 3.864478 | 7.781617 |
| C  | 10.820373 | 3.950665 | 7.339133 |
| O  | 9.945228  | 4.708527 | 7.882935 |
| C  | 13.617488 | 1.287692 | 5.330344 |
| C  | 12.638950 | 4.703050 | 8.940722 |
| H  | 10.949990 | 1.668283 | 4.708686 |
| H  | 14.081150 | 2.925284 | 7.433589 |
| H  | 13.164701 | 0.715954 | 4.500212 |
| H  | 14.044878 | 0.563647 | 6.054050 |

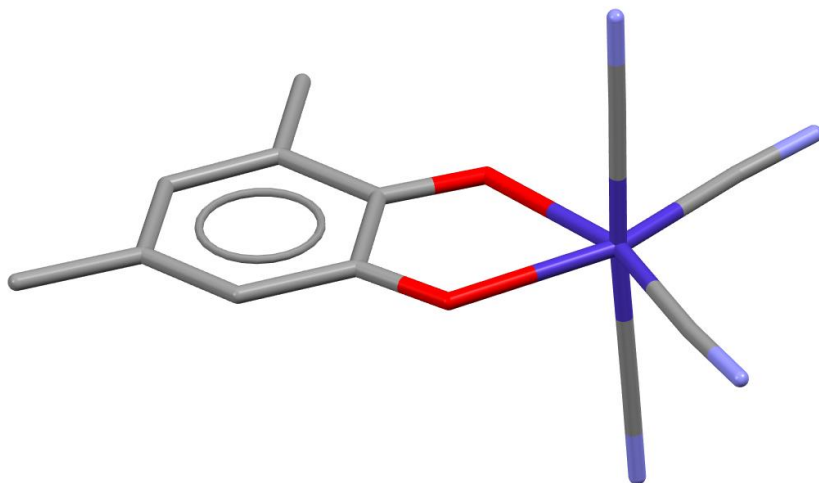

|   |           |          |          |
|---|-----------|----------|----------|
| H | 14.472020 | 1.866277 | 4.923001 |
| H | 12.498759 | 5.783099 | 8.733080 |
| H | 13.705998 | 4.529604 | 9.170131 |
| H | 12.046375 | 4.483192 | 9.851503 |

**Optimized geometry for Co(dioxolene)(CN)<sub>4</sub><sup>2-</sup>:  $S = 1/2$ ,  $\langle S^2 \rangle = 0.753036$**

|    |           |          |          |
|----|-----------|----------|----------|
| Co | 8.158879  | 4.583325 | 7.000981 |
| C  | 7.365056  | 5.796039 | 8.115890 |
| N  | 6.882079  | 6.580923 | 8.848962 |
| C  | 6.571518  | 4.380029 | 6.116854 |
| N  | 5.561401  | 4.225066 | 5.531886 |
| C  | 8.583973  | 6.002781 | 5.831852 |
| N  | 8.863301  | 6.885510 | 5.105616 |
| C  | 7.621332  | 3.209552 | 8.178623 |
| N  | 7.289386  | 2.348048 | 8.908205 |
| O  | 9.102164  | 3.288520 | 5.849454 |
| C  | 10.342134 | 3.162101 | 6.208441 |
| C  | 11.257234 | 2.292969 | 5.557113 |
| C  | 12.574957 | 2.212435 | 5.996956 |
| C  | 12.992138 | 3.014037 | 7.107292 |
| C  | 12.145719 | 3.881745 | 7.787212 |
| C  | 10.786250 | 3.963775 | 7.336813 |
| O  | 9.906948  | 4.734696 | 7.892994 |
| C  | 13.571795 | 1.304713 | 5.331607 |
| C  | 12.598540 | 4.716553 | 8.948477 |
| H  | 10.902796 | 1.694389 | 4.708427 |
| H  | 14.037697 | 2.937669 | 7.438343 |
| H  | 13.117636 | 0.734980 | 4.500950 |
| H  | 13.996795 | 0.579146 | 6.055062 |

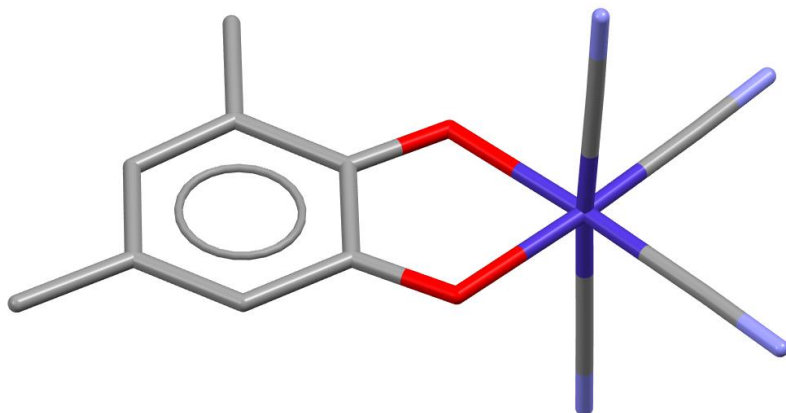

|   |           |          |          |
|---|-----------|----------|----------|
| H | 14.427753 | 1.881903 | 4.925548 |
| H | 12.463063 | 5.797303 | 8.742235 |
| H | 13.664460 | 4.538419 | 9.178995 |
| H | 12.003801 | 4.496562 | 9.857603 |
